# Supplementary material
Source: Royal Society of Chemistry journal article supplement (doi:10.1039/d5en00836k)
Supplement: d5en00836k1.xlsx [file d5en00836k1.xlsx]

## Sheet: Only_Ag
Protein.Group	Protein.ID	protein	X.10lgP	Coverage....	Coverage.....Ag1	Coverage.....Ag2	Coverage.....PS.C1	Coverage.....PS.C2	Coverage.....PS.N1	Coverage.....PS.N2	Coverage.....TiO2_1	Coverage.....TiO2_2	Area_Ag1	Area_Ag2	Area_PS.C1	Area_PS.C2	Area_PS.N1	Area_PS.N2	Area_TiO2_1	Area_TiO2_2	X.Peptides	X.Unique	Spec_Ag_1	Spec_Ag_2	Spec_PSC_1	Spec_PSC_2	Spec_PSN_1	Spec_PSN_2	Spec_TiO2_1	Spec_TiO2_2	PTM	Avg..Mass	Spur_match	Description_clean	PFAM	length	present_Ag	present_TiO2	present_PSC	present_PSN
55	51	PL30406.1	172.71	32	24	26	0	0	0	0	8	0	853270	1144600							6	6	5	5	0	0	0	0	2	0		27496	A0A7M7HDZ3_STRPU	Adenylate kinase	PF00406.26 Adenylate kinase	250	TRUE	FALSE	FALSE	FALSE
96	83	PL08543.1	150.25	20	20	10	0	0	0	0	4	0	1549100	611020					51816		4	4	4	2	0	0	0	0	1	0	Carbamidomethylation	33043	A0A7M7RCX9_STRPU	3'(2') 5'-bisphosphate nucleotidase 1	PF00459.29 Inositol monophosphatase family	306	TRUE	FALSE	FALSE	FALSE
103	148	PL16055.1	148.65	12	12	12	0	0	0	0	0	0	253180	151180							2	2	2	2	0	0	0	0	0	0	Carbamidomethylation	25362	A0A7M7PGG9_STRPU	Dehydrogenase/reductase SDR family member 6	PF13561.10 Enoyl-(Acyl carrier protein) reductase	238	TRUE	FALSE	FALSE	FALSE
77	171	PL22978.1	137.56	14	4	3	0	0	0	0	14	0							175200		3	2	1	1	0	0	0	0	3	0		27515	A0A7M7NFL0_STRPU	Glutathione transferase	PF14497.10 Glutathione S-transferase C-terminal domain	247	TRUE	FALSE	FALSE	FALSE
114	144	PL25915.3	134.01	8	6	4	0	0	0	0	2	0	70620	208800							3	3	2	2	0	0	0	0	1	0		59347	A0A7M7PML1_STRPU	kynurenine--oxoglutarate transaminase	PF00155.25 Aminotransferase class I and II	533	TRUE	FALSE	FALSE	FALSE
60	169	PL22170.1	123.63	20	7	20	0	0	0	0	12	0		226230							4	1	1	4	0	0	0	0	4	0		16480	A0A7M7NFL0_STRPU	Glutathione transferase	PF14497.10 Glutathione S-transferase C-terminal domain	146	TRUE	FALSE	FALSE	FALSE
107	129	PL38374.1	121.12	13	8	5	0	0	0	0	0	0	212980								3	3	2	1	0	0	0	0	0	0		36577	A0A7M7SZX5_STRPU	Transaldolase	PF00923.23 Transaldolase/Fructose-6-phosphate aldolase	332	TRUE	FALSE	FALSE	FALSE
115	168	PL20764.1	115.62	13	9	13	0	0	0	0	0	0	261380	291020							3	3	2	3	0	0	0	0	0	0	Carbamidomethylation	32862	A0A7M7NQH3_STRPU	Regucalcin	PF08450.16 SMP-30/Gluconolactonase/LRE-like region	297	TRUE	FALSE	FALSE	FALSE
133	167	PL10208.1	113.1	4	4	4	0	0	0	0	0	0	213220	113830							1	1	1	1	0	0	0	0	0	0		38393	A0A7M7HQY2_STRPU	Enoyl reductase (ER) domain-containing protein	PF00107.30 Zinc-binding dehydrogenase	359	TRUE	FALSE	FALSE	FALSE
90	248	PL23511.1	106.36	15	15	15	0	0	0	0	0	15	104900	80851							2	2	2	2	0	0	0	0	0	2		8669	A0A7M7NF76_STRPU	Glutathione transferase	PF02798.24 Glutathione S-transferase N-terminal domain	74	TRUE	FALSE	FALSE	FALSE
94	120	PL30422.1	106.33	10	3	10	0	0	0	0	0	0	55543	28172							2	2	1	2	0	0	0	0	0	0		33098	A0A7M7REA5_STRPU	14-3-3 domain-containing protein	PF00244.24 14-3-3 protein	289	TRUE	FALSE	FALSE	FALSE
122	134	PL27336.1	103.34	22	8	11	0	0	0	0	3	0	194370	195470							4	3	1	3	0	0	0	0	1	0	Carbamidomethylation	35811	A0A7M7LSM8_STRPU	Uncharacterized protein	PF19798.3 Sulfotransferase domain	311	TRUE	FALSE	FALSE	FALSE
145	188	PL31241.1	101.79	6	2	4	0	0	0	0	2	0	110680	54684							2	2	1	1	0	0	0	0	1	0	Carbamidomethylation	45628	A0A7M7N422_STRPU	FAD dependent oxidoreductase domain-containing protein	PF01266.28 FAD dependent oxidoreductase	411	TRUE	FALSE	FALSE	FALSE
138	242	PL22951.1	94.47	6	3	6	0	0	0	0	3	0									2	1	1	2	0	0	0	0	1	0		33751	A0A7M7NKV7_STRPU	Sulfotransferase family protein	PF19798.3 Sulfotransferase domain	294	TRUE	FALSE	FALSE	FALSE
172	280	PL22992.1	90.31	4	4	4	0	0	0	0	0	0									1	1	1	1	0	0	0	0	0	0		38207	A0A7M7NFS3_STRPU	inorganic diphosphatase	PF00719.23 Inorganic pyrophosphatase	336	TRUE	FALSE	FALSE	FALSE
181	354	PL26998.2	88.22	7	7	7	0	0	0	0	0	0	315740	291780							1	1	1	1	0	0	0	0	0	0	Carbamidomethylation	21094	A0A7M7NK60_STRPU	Sulfotransferase family protein	PF19798.3 Sulfotransferase domain	181	TRUE	FALSE	FALSE	FALSE
137	268	PL01820.1	83.11	6	6	6	0	0	0	0	0	0	287290	172590							1	1	2	2	0	0	0	0	0	0	Carbamidomethylation	33355	A0A7M7N7J7_STRPU	Sorbitol dehydrogenase	PF08240.16 Alcohol dehydrogenase GroES-like domain	316	TRUE	FALSE	FALSE	FALSE
143	239	PL32335.2	81.7	8	8	4	0	0	0	0	0	0		180610							2	1	2	1	0	0	0	0	0	0		24857	A0A7M7HH15_STRPU	carbonyl reductase (DPH)	PF00106.29 short chain dehydrogenase	227	TRUE	FALSE	FALSE	FALSE
136	249	PL28243.1	78.55	5	3	3	0	0	0	0	5	0	314500	391980					267850		2	1	1	1	0	0	0	0	2	0	Carbamidomethylation	35580	A0A7M7P8Y9_STRPU	Sulfotransferase family protein	PF19798.3 Sulfotransferase domain	309	TRUE	FALSE	FALSE	FALSE
119	132	PL23316.1	72.59	5	5	5	0	0	0	0	0	0	537140	385610							1	1	1	1	0	0	0	0	0	0		23113	A0A7M7HNX1_STRPU	oxidoreductase domain-containing protein	PF00248.25 Aldo/keto reductase family	206	TRUE	FALSE	FALSE	FALSE
130	189	PL23506.1	67.77	5	5	5	0	0	0	0	0	0	62200	54867							1	1	1	1	0	0	0	0	0	0		23416	A0A7M7NG47_STRPU	Glutathione transferase	PF14497.10 Glutathione S-transferase C-terminal domain	205	TRUE	FALSE	FALSE	FALSE
182	363	PL31299.1	65.51	11	11	11	0	0	0	0	0	0									1	1	1	1	0	0	0	0	0	0	Carbamidomethylation	13044	A0A7M7N422_STRPU	FAD dependent oxidoreductase domain-containing protein	PF01266.28 FAD dependent oxidoreductase	118	TRUE	FALSE	FALSE	FALSE
161	289	PL38692.1	61.99	19	19	19	0	0	0	0	0	0	260510	310790							1	1	1	1	0	0	0	0	0	0		12920	A0A7M7RDY4_STRPU	Myotrophin	PF12796.11 Ankyrin repeats (3 copies)	118	TRUE	FALSE	FALSE	FALSE

## Sheet: Only_PSC
Protein.Group	Protein.ID	protein	X.10lgP	Coverage....	Coverage.....Ag1	Coverage.....Ag2	Coverage.....PS.C1	Coverage.....PS.C2	Coverage.....PS.N1	Coverage.....PS.N2	Coverage.....TiO2_1	Coverage.....TiO2_2	Area_Ag1	Area_Ag2	Area_PS.C1	Area_PS.C2	Area_PS.N1	Area_PS.N2	Area_TiO2_1	Area_TiO2_2	X.Peptides	X.Unique	Spec_Ag_1	Spec_Ag_2	Spec_PSC_1	Spec_PSC_2	Spec_PSN_1	Spec_PSN_2	Spec_TiO2_1	Spec_TiO2_2	PTM	Avg..Mass	Spur_match	Description_clean	PFAM	length	present_Ag	present_TiO2	present_PSC	present_PSN
66	84	PL07830.1	222.28	12	0	0	9	10	0	8	2	0			8782400	4047800		553680	254260		5	5	0	0	5	4	0	3	1	0	Carbamidomethylation	63189	A0A7M7NSL5_STRPU	CUB domain-containing protein	PF00058.21 Low-density lipoprotein receptor repeat class B	576	FALSE	FALSE	TRUE	FALSE
69	71	PL07343.1	201.35	7	0	0	7	5	2	0	0	0			7581800	2950800	32380				5	5	0	0	5	5	1	0	0	0	Carbamidomethylation	120813	A0A7M7MZ82_STRPU	Uncharacterized protein	PF17892.5 Cadherin-like domain	1079	FALSE	FALSE	TRUE	FALSE
89	60	PL36227.2	160.51	1	0	0	1	0	0	0	0	0			1315300	62468					5	5	0	0	6	2	0	0	0	0	Carbamidomethylation	419896	A0A7M7NX46_STRPU	Fibrocystin-L	PF01833.28 IPT/TIG domain	3873	FALSE	FALSE	TRUE	FALSE
132	164	PL03114.1	157.15	8	0	0	6	5	0	0	0	0				236960					3	1	0	0	2	2	0	0	0	0	Carbamidomethylation	55887	A0A7M7PIA9_STRPU	SRCR domain-containing protein	PF00530.22 Scavenger receptor cysteine-rich domain	511	FALSE	FALSE	TRUE	FALSE
97	89	PL00623.1	146.67	11	0	0	7	7	0	0	0	0			2602200	1720100					4	4	0	0	4	2	0	0	0	0	Carbamidomethylation	47399	A0A7M7N8T4_STRPU	Alpha-2-macroglobulin	PF01826.21 Trypsin Inhibitor like cysteine rich domain	438	FALSE	FALSE	TRUE	FALSE
123	157	PL09805.5	144.4	23	0	0	23	23	0	0	0	0			5474300	1502300					2	2	0	0	2	2	0	0	0	0	Carbamidomethylation	13958	A0A7M7HFQ4_STRPU	Uncharacterized protein	PF14651.10 Lipocalin / cytosolic fatty-acid binding protein family	129	FALSE	FALSE	TRUE	FALSE
102	102	PL29004.1	127.42	4	0	0	4	2	0	0	0	0			285650						5	4	0	0	4	2	0	0	0	0	Carbamidomethylation	141213	A0A7M7N2J2_STRPU	Alpha-2-macroglobulin	PF07678.18 A-macroglobulin TED domain	1274	FALSE	FALSE	TRUE	FALSE
105	237	PL05728.2	111.28	15	0	0	8	15	0	8	0	0			877870	652870		40491			2	2	0	0	2	3	0	1	0	0	Carbamidomethylation	19910	A0A7M7PY14_STRPU	Uncharacterized protein	PF00090.23 Thrombospondin type 1 domain	178	FALSE	FALSE	TRUE	FALSE
147	198	PL02224.1	109.87	2	0	0	2	1	0	0	0	0			408910	125400					2	2	0	0	2	1	0	0	0	0		140965	A0A7M7PIL1_STRPU	A0A7M7PIL1_STRPU Vitellogenin domain-containing protein		1275	FALSE	FALSE	TRUE	FALSE
129	177	PL34921.1	95.8	5	0	0	3	3	5	0	0	0			390020	154930	53455				2	2	0	0	1	1	2	0	0	0		54562	Q27780_STRPU	Protein disulfide-isomerase	PF00085.24 Thioredoxin	493	FALSE	FALSE	TRUE	FALSE
146	194	PL39025.1	95.13	3	0	0	3	2	0	0	0	0			719120						2	2	0	0	2	1	0	0	0	0	Carbamidomethylation	100103	A0A7M7LW30_STRPU	ZP domain-containing protein	PF00100.27 Zona pellucida-like domain	893	FALSE	FALSE	TRUE	FALSE
173	282	PL26698.1	80.37	3	0	0	3	3	0	0	0	0			938480	631200					1	1	0	0	1	1	0	0	0	0		41355	A0A7M7PNP5_STRPU	Uncharacterized protein	PF00089.30 Trypsin	369	FALSE	FALSE	TRUE	FALSE
176	357	PL13592.1	78.99	4	0	0	4	4	0	0	0	0			328540						1	1	0	0	1	1	0	0	0	0		32667	A0A7M7RDC7_STRPU	Malate dehydrogenase	PF00056.27 lactate/malate dehydrogenase D binding domain	311	FALSE	FALSE	TRUE	FALSE
154	406	PL25700.1	75.86	2	0	0	2	2	2	0	0	0			259260	159550					1	1	0	0	1	1	1	0	0	0		50014	O97379_STRPU	Scavenger receptor cysteine-rich protein type 5	PF00530.22 Scavenger receptor cysteine-rich domain	454	FALSE	FALSE	TRUE	FALSE
148	271	PL04694.1	67.86	10	0	0	10	10	0	0	0	0			436470						1	1	0	0	1	1	0	0	0	0		11776	A0A7M7G009_STRPU	A0A7M7G009_STRPU Short-chain collagen C4		107	FALSE	FALSE	TRUE	FALSE
184	382	PL17524.1	58.37	2	0	0	2	2	0	0	0	0			64665						1	1	0	0	1	1	0	0	0	0		55173	A0A7M7PFI7_STRPU	FERM domain-containing protein	PF00769.23 Ezrin/radixin/moesin family C terminal	476	FALSE	FALSE	TRUE	FALSE
167	295	PL00368.1	57.28	5	0	0	5	5	0	0	0	0			143000						1	1	0	0	1	1	0	0	0	0		31178	A0A7M7NBE4_STRPU	Tropomyosin	PF00261.24 Tropomyosin	268	FALSE	FALSE	TRUE	FALSE

## Sheet: Only_PSN
Protein.Group	Protein.ID	protein	X.10lgP	Coverage....	Coverage.....Ag1	Coverage.....Ag2	Coverage.....PS.C1	Coverage.....PS.C2	Coverage.....PS.N1	Coverage.....PS.N2	Coverage.....TiO2_1	Coverage.....TiO2_2	Area_Ag1	Area_Ag2	Area_PS.C1	Area_PS.C2	Area_PS.N1	Area_PS.N2	Area_TiO2_1	Area_TiO2_2	X.Peptides	X.Unique	Spec_Ag_1	Spec_Ag_2	Spec_PSC_1	Spec_PSC_2	Spec_PSN_1	Spec_PSN_2	Spec_TiO2_1	Spec_TiO2_2	PTM	Avg..Mass	Spur_match	Description_clean	PFAM	length	present_Ag	present_TiO2	present_PSC	present_PSN
100	154	PL26388.1	156.84	15	0	0	3	0	5	11	0	0			447660		161660				4	4	0	0	1	0	2	2	0	0	Carbamidomethylation	34705	A0A7M7PNP5_STRPU	Uncharacterized protein	PF12947.11 EGF domain	316	FALSE	FALSE	FALSE	TRUE
112	161	PL30180.1	124.72	6	0	3	0	0	3	3	3	0		44903			5316.5				2	2	0	1	0	0	1	1	1	0		44521	A0A7M7REE9_STRPU	Aldehyde dehydrogenase domain-containing protein	PF00171.26 Aldehyde dehydrogenase family	409	FALSE	FALSE	FALSE	TRUE
116	234	PL26350.1	119.53	21	0	0	0	0	8	21	0	0					151160	1285000			3	3	0	0	0	0	1	3	0	0	Carbamidomethylation	20191	A0A7M7NSR3_STRPU	C-type lectin domain-containing protein	PF00059.25 Lectin C-type domain	177	FALSE	FALSE	FALSE	TRUE
185	385	PL02650.1	75.48	3	0	0	0	0	3	3	0	0					84945				1	1	0	0	0	0	1	1	0	0		35304	A0A7M7T0Y3_STRPU	Fibrinogen C-terminal domain-containing protein	PF00147.22 Fibrinogen beta and gamma chains C-terminal globular domain	319	FALSE	FALSE	FALSE	TRUE
152	367	PL39839.1	60.26	4	0	0	0	0	4	4	0	0					46060	53154			1	1	0	0	0	0	1	2	0	0		37457	A0A7M7NZE3_STRPU	A0A7M7NZE3_STRPU Sushi domain-containing protein		329	FALSE	FALSE	FALSE	TRUE

## Sheet: Only_TiO2
Protein.Group	Protein.ID	protein	X.10lgP	Coverage....	Coverage.....Ag1	Coverage.....Ag2	Coverage.....PS.C1	Coverage.....PS.C2	Coverage.....PS.N1	Coverage.....PS.N2	Coverage.....TiO2_1	Coverage.....TiO2_2	Area_Ag1	Area_Ag2	Area_PS.C1	Area_PS.C2	Area_PS.N1	Area_PS.N2	Area_TiO2_1	Area_TiO2_2	X.Peptides	X.Unique	Spec_Ag_1	Spec_Ag_2	Spec_PSC_1	Spec_PSC_2	Spec_PSN_1	Spec_PSN_2	Spec_TiO2_1	Spec_TiO2_2	PTM	Avg..Mass	Spur_match	Description_clean	PFAM	length	present_Ag	present_TiO2	present_PSC	present_PSN
108	145	PL06686.1	127.31	9	0	8	0	0	0	0	4	6							148890	11353	3	3	0	2	0	0	0	0	1	2		36365	A0A7M7MXA6_STRPU	Sulfotransferase domain-containing protein	PF00685.31 Sulfotransferase domain	319	FALSE	TRUE	FALSE	FALSE
149	338	PL24163.2	82.03	16	16	0	0	0	0	0	16	16								21364	1	1	1	0	0	0	0	0	1	1	Carbamidomethylation	10604	A0A7M7GI80_STRPU	Uncharacterized protein	PF10731.13 Thrombin inhibitor from mosquito	96	FALSE	TRUE	FALSE	FALSE
186	386	PL32784.1	59.66	2	0	0	0	0	0	0	2	2							145930		1	1	0	0	0	0	0	0	1	1		56170	A0A7M7P698_STRPU	ATP synthase subunit beta	PF00006.29 ATP synthase alpha/beta family nucleotide-binding domain	523	FALSE	TRUE	FALSE	FALSE

## Sheet: Ag_and_PSC
Protein.Group	Protein.ID	protein	X.10lgP	Coverage....	Coverage.....Ag1	Coverage.....Ag2	Coverage.....PS.C1	Coverage.....PS.C2	Coverage.....PS.N1	Coverage.....PS.N2	Coverage.....TiO2_1	Coverage.....TiO2_2	Area_Ag1	Area_Ag2	Area_PS.C1	Area_PS.C2	Area_PS.N1	Area_PS.N2	Area_TiO2_1	Area_TiO2_2	X.Peptides	X.Unique	Spec_Ag_1	Spec_Ag_2	Spec_PSC_1	Spec_PSC_2	Spec_PSN_1	Spec_PSN_2	Spec_TiO2_1	Spec_TiO2_2	PTM	Avg..Mass	Spur_match	Description_clean	PFAM	length	present_Ag	present_TiO2	present_PSC	present_PSN
1	2	PL26503.2	425.35	45	22	8	36	32	33	31	19	13	7994200	2754300	557320000	243930000	40879000	35121000	10563000	2220600	54	54	23	13	50	46	53	40	23	14	Carbamidomethylation; Oxidation (M)	135792	MYP_STRPU	Major yolk protein	PF00405.21 Transferrin	1190	TRUE	TRUE	TRUE	TRUE
2	4	PL25768.1	424.23	30	14	17	27	27	19	20	15	11	7182800	5829300	115270000	90275000	8071500	16203000	4780300	3291800	46	28	16	22	44	39	26	29	20	15	Carbamidomethylation	156961	O44344_STRPU	Complement component C3 GN=Sp064	PF07678.18 A-macroglobulin TED domain	1421	TRUE	TRUE	TRUE	TRUE
3	1	PL38033.1	390.52	64	64	63	39	34	42	29	39	13	79432000	74554000	59167000	31550000	4737800	3035900	13544000	1718700	43	43	40	45	24	19	20	13	18	6	Carbamidomethylation; Oxidation (M)	58007	A0A7M7P149_STRPU	Catalase	PF00199.23 Catalase	513	TRUE	TRUE	TRUE	TRUE
6	3	PL25890.1	384.04	46	11	15	45	39	14	16	11	12	481030	585090	49979000	17453000	610570	305180	252580	185380	32	18	6	9	33	31	13	11	8	7	Carbamidomethylation	78567	O44344_STRPU	Complement component C3 GN=Sp064	PF00207.26 Alpha-2-macroglobulin family	705	TRUE	TRUE	TRUE	TRUE
4	11	PL26659.4	357.44	68	68	51	54	44	24	24	44	40	63759000	31519000	62212000	38504000	1204400	560830	17354000	3739300	28	17	33	31	29	25	11	9	23	15	Carbamidomethylation; Oxidation (M)	41845	A0A7M7HL75_STRPU	Uncharacterized protein	PF00022.23 Actin	376	TRUE	TRUE	TRUE	TRUE
8	5	PL26274.3	328.1	19	1	3	14	14	7	10	4	2		632580	26519000	15610000	1422500	3975200	477860	84299	27	20	2	6	20	17	11	16	6	3	Carbamidomethylation	192120	A0A7M7PKK5_STRPU	Sushi von Willebrand factor type A EGF and pentraxin domain-containing protein 1	PF00084.24 Sushi repeat (SCR repeat)	1725	TRUE	TRUE	TRUE	TRUE
5	26	PL26138.1	318.65	25	24	25	18	18	24	18	25	25	7921500	12191000	49017000	27090000	8357000	7378300	8084800	6404200	20	16	15	19	12	11	17	14	19	17	Carbamidomethylation	57091	O44344_STRPU	Complement component C3 GN=Sp064	PF07678.18 A-macroglobulin TED domain	509	TRUE	TRUE	TRUE	TRUE
11	18	PL26675.1	307.32	23	5	7	20	18	19	17	3	3	966580	884050	74475000	37685000	10699000	30903000	1436100	529010	13	8	3	5	13	11	12	11	2	2		85531	A0A7M7PQN1_STRPU	Deleted in malignant brain tumors 1 protein	PF00629.27 MAM domain meprin/A5/mu	760	TRUE	TRUE	TRUE	TRUE
7	42	PL34538.1	282.12	28	24	17	24	20	14	14	20	17			607500						12	1	16	15	18	14	7	6	13	9	Oxidation (M)	41874	A0A7M7RBN7_STRPU	Actin	PF00022.23 Actin	376	TRUE	TRUE	TRUE	TRUE
18	21	PL06703.1	282	27	11	22	10	5	13	6	6	6	1819800	4030700	3010400	475840	648640	890140	223170	319470	13	13	6	12	4	2	5	3	3	3	Carbamidomethylation	55230	A0A7M7RC60_STRPU	Methanethiol oxidase	PF05694.15 56kDa selenium binding protein (SBP56)	491	TRUE	TRUE	TRUE	TRUE
9	12	PL31265.1	280.32	46	26	32	8	9	8	10	42	25	1226900	1252700	1446400	476690	41609		3032300	346530	15	15	9	11	3	3	3	3	14	7	Carbamidomethylation	47433	A0A7M7RB25_STRPU	Adenosylhomocysteinase	PF05221.21 S-adenosyl-L-homocysteine hydrolase	431	TRUE	TRUE	TRUE	TRUE
13	57	PL14802.1	279.21	35	34	34	24	24	22	33	26	19	9585700	4619200	7505100	3099300	1557200	4160900	2395000	3764800	11	6	7	7	7	6	6	8	8	7	Carbamidomethylation	31668	A0A7M7PB24_STRPU	Short-chain collagen C4	PF01391.22 Collagen triple helix repeat (20 copies)	295	TRUE	TRUE	TRUE	TRUE
12	15	PL16565.1	270.89	56	53	56	15	8	9	0	28	10	6049600	3866000	2105900	470630	132710		2577200	614160	15	13	15	14	4	2	2	0	8	2	Carbamidomethylation	34691	A0A7M7PLT2_STRPU	Hcy-binding domain-containing protein	PF02574.20 Homocysteine S-methyltransferase	319	TRUE	TRUE	TRUE	FALSE
16	17	PL41113.2	257.86	34	25	19	13	10	11	8	27	23	2381100	2159500	1737000	576760	290340	345520	2874000	1147600	12	6	8	6	4	3	3	2	8	7		50051	A0A7M7GHQ8_STRPU	Tubulin beta chain	PF00091.29 Tubulin/FtsZ family GTPase domain	447	TRUE	TRUE	TRUE	TRUE
20	23	PL26953.1	257.2	48	15	17	7	8	25	20	38	35	840940	381370		666120	516090	135190	5035000	2473900	11	11	4	4	2	2	5	4	9	9	Carbamidomethylation	36545	A0A7M7NZ19_STRPU	Glyceraldehyde-3-phosphate dehydrogenase	PF02800.24 Glyceraldehyde 3-phosphate dehydrogenase C-terminal domain	338	TRUE	TRUE	TRUE	TRUE
33	16	PL03755.1	255.86	8	1	1	1	3	5	6	1	0	223520		810020	199050	882290	926150			11	11	2	1	2	3	8	9	1	0		198844	O97375_STRPU	Scavenger receptor cysteine-rich protein type 12 GN=SRCR12	PF00530.22 Scavenger receptor cysteine-rich domain	1886	TRUE	FALSE	TRUE	TRUE
28	35	PL17343.1	248.94	27	12	8	3	3	3	3	24	3	1300100	332690	1162900		13007		4729600	278480	11	11	4	3	1	1	1	1	10	1	Carbamidomethylation	50194	A0A7M7T390_STRPU	Tubulin alpha chain	PF00091.29 Tubulin/FtsZ family GTPase domain	451	TRUE	TRUE	TRUE	TRUE
24	59	PL15790.1	248.02	27	16	7	26	26	23	18	18	3	1417000		9583600	3981500	344830	73073	275050		8	2	3	2	7	6	5	5	5	1	Carbamidomethylation	33406	A0A7M7G009_STRPU	Short-chain collagen C4	PF01391.22 Collagen triple helix repeat (20 copies)	311	TRUE	TRUE	TRUE	TRUE
31	43	PL39260.1	244.64	34	31	31	8	15	0	0	11	4	2930600	1487700	1602400	819800			289190	42046	9	9	8	9	2	3	0	0	3	1	Carbamidomethylation	37985	A0A7M7P3F2_STRPU	Prostaglandin reductase 1	PF16884.9 N-terminal domain of oxidoreductase	348	TRUE	TRUE	TRUE	FALSE
14	66	PL21312.1	243.31	52	52	33	13	7	3	3	36	23	14784000	8322500	481490				8012800	2561900	10	8	15	10	3	1	1	1	12	7	Carbamidomethylation; Oxidation (M)	23744	A0A7M7NGH2_STRPU	Glutathione transferase	PF14497.10 Glutathione S-transferase C-terminal domain	210	TRUE	TRUE	TRUE	TRUE
17	109	PL31564.1	240.51	10	4	6	8	10	6	7	0	2	634790	1486700	13884000	11651000	570970	380550		26573	8	5	3	5	9	11	6	5	0	1		96261	A0A7M7HJ75_STRPU	Fibrinogen C-terminal domain-containing protein	PF00147.22 Fibrinogen beta and gamma chains C-terminal globular domain	851	TRUE	FALSE	TRUE	TRUE
56	91	PL22408.1	227.33	35	21	23	17	13	0	0	7	0	2678100	2890100	1124900				245660		8	8	4	6	3	2	0	0	1	0		24111	A0A7M7RFE6_STRPU	Glycolipid transfer protein domain-containing protein	PF08718.15 Glycolipid transfer protein (GLTP)	221	TRUE	FALSE	TRUE	FALSE
36	80	PL07127.1	223.61	17	16	12	3	5	6	3	8	13	148510	90844						165080	6	2	5	5	1	2	2	1	3	4		55004	A0A7M7PPM4_STRPU	Aldehyde dehydrogenase domain-containing protein	PF00171.26 Aldehyde dehydrogenase family	508	TRUE	TRUE	TRUE	TRUE
54	104	PL13789.3	221.31	24	20	13	9	4	0	0	5	0	1221000	812010	678340	339330			71119		8	8	6	4	2	1	0	0	1	0	Carbamidomethylation	39429	A0A7M6UV80_STRPU	Fructose-bisphosphate aldolase	PF00274.23 Fructose-bisphosphate aldolase class-I	365	TRUE	FALSE	TRUE	FALSE
15	81	PL34472.1	219.37	25	25	21	12	12	15	8	25	16	1300000	1304100			68072	33440	1623800	17897	9	6	8	8	3	2	4	2	7	3	Carbamidomethylation	27215	A0A7M7RAD9_STRPU	Uncharacterized protein	PF00106.29 short chain dehydrogenase	248	TRUE	TRUE	TRUE	TRUE
21	19	PL01553.1	218.31	33	21	16	18	14	8	8	16	16	1103500	1521700	2955700	1374500	143290	171420	1061900	338620	9	9	5	5	4	3	2	3	4	4	Carbamidomethylation	45229	A0A7M7TG37_STRPU	Hcy-binding domain-containing protein	PF02574.20 Homocysteine S-methyltransferase	408	TRUE	TRUE	TRUE	TRUE
39	20	PL35376.4	218.03	35	21	20	4	4	0	0	0	0	530910	718990	472860	566390					12	12	9	7	1	1	0	0	0	0	Carbamidomethylation	54810	FASC_STRPU	Fascin	PF06268.17 Fascin domain	496	TRUE	FALSE	TRUE	FALSE
37	107	PL38654.1	215.68	4	1	4	1	2	1	1	3	3	177320	942050		156810		101910	363270	212440	5	3	2	7	1	3	1	3	3	3	Carbamidomethylation	188812	A0A7M7NCU8_STRPU	SRCR domain-containing protein	PF00530.22 Scavenger receptor cysteine-rich domain	1763	TRUE	TRUE	TRUE	TRUE
23	67	PL17933.1	210.05	33	29	26	6	11	17	19	4	11	1908100	954120	2755300	1580100	1137800	1410900	123110	99710	7	7	8	7	3	4	6	4	1	3	Carbamidomethylation	33248	A0A7M7PGJ5_STRPU	SUEL-type lectin domain-containing protein	PF02140.22 Galactose binding lectin domain	309	TRUE	TRUE	TRUE	TRUE
43	82	PL23070.1	199.96	25	15	18	16	9	9	3	18	3	342500	404400		597110	16949		86071		5	3	3	4	3	2	2	1	4	1		26176	A0A7M7NEX5_STRPU	Glutathione S-transferase	PF14497.10 Glutathione S-transferase C-terminal domain	233	TRUE	TRUE	TRUE	TRUE
45	108	PL10557.3	199.81	35	18	21	25	11	11	11	11	11	3011000	1612400	1407000	643530	538470		719960	322530	6	6	4	3	3	1	2	1	2	2	Carbamidomethylation	17758		PF00241.24 Cofilin/tropomyosin-type actin-binding protein	PF00241.24 Cofilin/tropomyosin-type actin-binding protein	161	TRUE	TRUE	TRUE	TRUE
25	77	PL16192.1	199.73	25	24	19	6	4	4	4	10	8	399620	849810							8	4	7	9	2	1	1	2	3	2	Carbamidomethylation	39597	A0A7M7PH34_STRPU	Hcy-binding domain-containing protein	PF02574.20 Homocysteine S-methyltransferase	360	TRUE	TRUE	TRUE	TRUE
42	88	PL23634.1	196.18	30	5	5	27	19	19	21	9	5			902150	324610	105870	88927			6	3	1	1	5	3	3	4	2	1	Carbamidomethylation	20443	A0A7M7G009_STRPU	A0A7M7G009_STRPU Short-chain collagen C4		187	TRUE	TRUE	TRUE	TRUE
26	78	PL17102.1	196.17	19	14	14	6	4	7	4	18	12							418760	159990	6	1	5	7	2	1	2	2	5	3	Carbamidomethylation	40049	A0A7M7PGW5_STRPU	Hcy-binding domain-containing protein	PF02574.20 Homocysteine S-methyltransferase	360	TRUE	TRUE	TRUE	TRUE
61	125	PL07795.1	195.69	34	28	28	18	11	21	10	21	21									4	1	3	3	2	1	2	1	2	2		16661	A0A7M7PPM4_STRPU	Aldehyde dehydrogenase domain-containing protein	PF00171.26 Aldehyde dehydrogenase family	154	TRUE	TRUE	TRUE	TRUE
32	106	PL19029.1	194.93	19	4	11	13	4	19	9	0	0	23933	128650	1152600	28224	2357200	1108000			6	6	1	3	3	2	9	2	0	0	Carbamidomethylation	45554	A0A7M7LT22_STRPU	SRCR domain-containing protein	PF00530.22 Scavenger receptor cysteine-rich domain	423	TRUE	FALSE	TRUE	TRUE
34	136	PL25464.1	186.21	30	5	5	16	26	30	30	5	5	861880	847400	32312000	19275000	5570700	13828000	1085600	242000	7	6	1	1	3	5	6	7	1	1		20432	A0A7M7PQN1_STRPU	Deleted in malignant brain tumors 1 protein	PF00431.24 CUB domain	182	TRUE	TRUE	TRUE	TRUE
44	135	PL35489.1	185.86	13	13	10	9	3	9	6	13	7	1075700	1586800	4021900	1562800	98769	185610	1361100	392010	4	1	4	3	3	1	3	2	4	2		34554	A0A7M7P327_STRPU	Uncharacterized protein	PF00106.29 short chain dehydrogenase	317	TRUE	TRUE	TRUE	TRUE
82	140	PL03944.1	177.12	36	10	16	26	23	0	0	0	0	161160	737010	923710	47860					4	4	1	2	3	2	0	0	0	0		11996	A0A7M7TH78_STRPU	Calponin	PF00402.22 Calponin family repeat	111	TRUE	FALSE	TRUE	FALSE
49	222	PL40767.1	176.49	10	5	5	10	9	8	9	0	0			3893400						4	1	1	2	4	4	3	4	0	0		42482	A0A7M7HJ75_STRPU	Fibrinogen C-terminal domain-containing protein	PF00147.22 Fibrinogen beta and gamma chains C-terminal globular domain	381	TRUE	FALSE	TRUE	TRUE
68	122	PL20598.1	159.68	5	2	3	3	3	5	3	2	0		227840	909700	486700	1710900	977990			3	3	1	2	2	2	3	2	1	0		102005	A0A7M7NZU0_STRPU	Deleted in malignant brain tumors 1 protein-like	PF00530.22 Scavenger receptor cysteine-rich domain	952	TRUE	FALSE	TRUE	TRUE
71	235	PL14473.1	159.5	15	10	5	5	5	15	10	10	5					97369	23061	55217		4	3	2	1	1	1	4	2	2	1		17275	A0A7M7REZ4_STRPU	C-type lectin domain-containing protein	PF05473.16 UL45 protein carbohydrate-binding C-type lectin-like	154	TRUE	TRUE	TRUE	TRUE
72	163	PL29801.2	159.01	31	21	31	21	14	14	10	14	0	57383	440670	1178600	178160	35183	14433	99984		3	3	2	3	2	1	1	1	1	0	Carbamidomethylation	14696	PROF1_STRPU	Profilin	PF00235.23 Profilin	140	TRUE	FALSE	TRUE	TRUE
52	170	PL23092.1	158.6	18	9	18	14	9	9	9	18	9							17234		3	1	1	3	2	1	1	1	3	1		23367	A0A7M7NFL0_STRPU	Glutathione transferase	PF14497.10 Glutathione S-transferase C-terminal domain	206	TRUE	TRUE	TRUE	TRUE
58	147	PL13748.1	158.1	7	2	2	7	7	4	7	4	2			1294900	303930					4	1	1	1	4	3	2	3	2	1	Carbamidomethylation	41895	A0A7M7G009_STRPU	Short-chain collagen C4	PF01391.22 Collagen triple helix repeat (20 copies)	391	TRUE	TRUE	TRUE	TRUE
88	103	PL23612.1	158.08	23	9	15	8	8	0	0	3	0	303510	302400	408910	115540					5	4	3	4	1	1	0	0	1	0		33624	A0A7M7NKV7_STRPU	Sulfotransferase family protein	PF19798.3 Sulfotransferase domain	293	TRUE	FALSE	TRUE	FALSE
65	114	PL33331.1	157.74	17	11	13	3	3	0	3	13	0	404460	121890	358700	265930			444540		4	4	2	3	1	1	0	1	3	0	Carbamidomethylation	38273	A0A7M7NIF6_STRPU	Sulfotransferase domain-containing protein	PF00685.31 Sulfotransferase domain	332	TRUE	FALSE	TRUE	FALSE
50	149	PL14716.1	156.5	19	12	12	4	4	19	19	12	12	241290	347720			169590	381840		41725	3	2	3	3	1	1	4	3	2	2	Carbamidomethylation	19105	A0A7M7G123_STRPU	C-type lectin domain-containing protein	PF00059.25 Lectin C-type domain	171	TRUE	TRUE	TRUE	TRUE
80	219	PL37901.1	154.99	10	10	10	10	5	0	0	5	5	42994		534380	345420					2	2	2	2	3	1	0	0	1	2	Carbamidomethylation	45613	A0A7M7T0F1_STRPU	SRCR domain-containing protein	PF00008.31 EGF-like domain	421	TRUE	TRUE	TRUE	FALSE
70	209	PL39157.1	139.56	6	6	2	2	2	6	6	0	0	71628	67482	952880	300380	1115600	889950			2	2	2	1	2	1	4	3	0	0	Carbamidomethylation	53282	A0A7M7P1Q8_STRPU	Sushi domain-containing protein	PF00084.24 Sushi repeat (SCR repeat)	480	TRUE	FALSE	TRUE	TRUE
85	229	PL39358.1	138.3	3	1	1	1	1	1	3	1	1						111680			2	1	1	2	1	1	1	3	1	1		104777	A0A7M7NZU0_STRPU	Deleted in malignant brain tumors 1 protein-like	PF00530.22 Scavenger receptor cysteine-rich domain	975	TRUE	TRUE	TRUE	TRUE
73	143	PL06163.1	134.29	13	9	9	4	2	0	0	2	9	285370	240950						214350	3	2	2	2	1	1	0	0	1	2		42880	A0A7M7PPM4_STRPU	Aldehyde dehydrogenase domain-containing protein	PF00171.26 Aldehyde dehydrogenase family	404	TRUE	TRUE	TRUE	FALSE
110	156	PL06418.1	124.48	10	4	3	4	6	0	0	0	0			193660	30714					3	3	1	1	1	2	0	0	0	0	Carbamidomethylation	52157	A0A7M7PRG9_STRPU	Succinate-semialdehyde dehydrogenase	PF00171.26 Aldehyde dehydrogenase family	490	TRUE	FALSE	TRUE	FALSE
91	165	PL22012.1	115.9	25	17	25	6	6	0	0	0	0	227400	193250	88103						3	3	2	4	1	1	0	0	0	0	Carbamidomethylation	15019	A0A7M7REH8_STRPU	Peptidyl-prolyl cis-trans isomerase	PF00160.25 Cyclophilin type peptidyl-prolyl cis-trans isomerase/CLD	142	TRUE	FALSE	TRUE	FALSE
75	227	PL36819.1	115.57	16	9	9	9	9	16	16	9	9						297970			2	1	1	1	1	1	3	2	1	1		18831	A0A7M7RHI3_STRPU	C-type lectin domain-containing protein	PF00059.25 Lectin C-type domain	169	TRUE	TRUE	TRUE	TRUE
99	174	PL18035.1	112.34	13	7	7	13	7	7	7	7	0	367500	289580	3764300	1633000	83629	182170	234970		2	2	1	1	2	1	1	1	1	0	Carbamidomethylation	19084	A0A7M7NMD9_STRPU	C-type lectin domain-containing protein	PF00059.25 Lectin C-type domain	167	TRUE	FALSE	TRUE	TRUE
81	230	PL36762.1	105.16	17	17	10	10	10	17	17	10	10	267380				382660	280740			2	1	2	1	1	1	2	2	1	1	Carbamidomethylation	16103	A0A7M7NMI9_STRPU	C-type lectin domain-containing protein	PF00059.25 Lectin C-type domain	143	TRUE	TRUE	TRUE	TRUE
98	191	PL25801.1	103.36	4	2	2	4	2	2	2	2	2			413540						2	1	1	1	2	1	1	1	1	1	Carbamidomethylation	51414	A0A7M7T4K1_STRPU	Uncharacterized protein	PF00084.24 Sushi repeat (SCR repeat)	456	TRUE	TRUE	TRUE	TRUE
59	334	PL13640.1	91.67	3	3	3	3	3	3	3	3	3	2964100	829040	1268100	1336300	677040	402140	634380	171460	1	1	2	3	2	2	2	2	1	1	Carbamidomethylation	63360	A0A7M7P9Z2_STRPU	Deleted in malignant brain tumors 1 protein-like	PF00530.22 Scavenger receptor cysteine-rich domain	604	TRUE	TRUE	TRUE	TRUE

## Sheet: Ag_and_PSN
Protein.Group	Protein.ID	protein	X.10lgP	Coverage....	Coverage.....Ag1	Coverage.....Ag2	Coverage.....PS.C1	Coverage.....PS.C2	Coverage.....PS.N1	Coverage.....PS.N2	Coverage.....TiO2_1	Coverage.....TiO2_2	Area_Ag1	Area_Ag2	Area_PS.C1	Area_PS.C2	Area_PS.N1	Area_PS.N2	Area_TiO2_1	Area_TiO2_2	X.Peptides	X.Unique	Spec_Ag_1	Spec_Ag_2	Spec_PSC_1	Spec_PSC_2	Spec_PSN_1	Spec_PSN_2	Spec_TiO2_1	Spec_TiO2_2	PTM	Avg..Mass	Spur_match	Description_clean	PFAM	length	present_Ag	present_TiO2	present_PSC	present_PSN
1	2	PL26503.2	425.35	45	22	8	36	32	33	31	19	13	7994200	2754300	557320000	243930000	40879000	35121000	10563000	2220600	54	54	23	13	50	46	53	40	23	14	Carbamidomethylation; Oxidation (M)	135792	MYP_STRPU	Major yolk protein	PF00405.21 Transferrin	1190	TRUE	TRUE	TRUE	TRUE
2	4	PL25768.1	424.23	30	14	17	27	27	19	20	15	11	7182800	5829300	115270000	90275000	8071500	16203000	4780300	3291800	46	28	16	22	44	39	26	29	20	15	Carbamidomethylation	156961	O44344_STRPU	Complement component C3 GN=Sp064	PF07678.18 A-macroglobulin TED domain	1421	TRUE	TRUE	TRUE	TRUE
3	1	PL38033.1	390.52	64	64	63	39	34	42	29	39	13	79432000	74554000	59167000	31550000	4737800	3035900	13544000	1718700	43	43	40	45	24	19	20	13	18	6	Carbamidomethylation; Oxidation (M)	58007	A0A7M7P149_STRPU	Catalase	PF00199.23 Catalase	513	TRUE	TRUE	TRUE	TRUE
6	3	PL25890.1	384.04	46	11	15	45	39	14	16	11	12	481030	585090	49979000	17453000	610570	305180	252580	185380	32	18	6	9	33	31	13	11	8	7	Carbamidomethylation	78567	O44344_STRPU	Complement component C3 GN=Sp064	PF00207.26 Alpha-2-macroglobulin family	705	TRUE	TRUE	TRUE	TRUE
4	11	PL26659.4	357.44	68	68	51	54	44	24	24	44	40	63759000	31519000	62212000	38504000	1204400	560830	17354000	3739300	28	17	33	31	29	25	11	9	23	15	Carbamidomethylation; Oxidation (M)	41845	A0A7M7HL75_STRPU	Uncharacterized protein	PF00022.23 Actin	376	TRUE	TRUE	TRUE	TRUE
8	5	PL26274.3	328.1	19	1	3	14	14	7	10	4	2		632580	26519000	15610000	1422500	3975200	477860	84299	27	20	2	6	20	17	11	16	6	3	Carbamidomethylation	192120	A0A7M7PKK5_STRPU	Sushi von Willebrand factor type A EGF and pentraxin domain-containing protein 1	PF00084.24 Sushi repeat (SCR repeat)	1725	TRUE	TRUE	TRUE	TRUE
5	26	PL26138.1	318.65	25	24	25	18	18	24	18	25	25	7921500	12191000	49017000	27090000	8357000	7378300	8084800	6404200	20	16	15	19	12	11	17	14	19	17	Carbamidomethylation	57091	O44344_STRPU	Complement component C3 GN=Sp064	PF07678.18 A-macroglobulin TED domain	509	TRUE	TRUE	TRUE	TRUE
11	18	PL26675.1	307.32	23	5	7	20	18	19	17	3	3	966580	884050	74475000	37685000	10699000	30903000	1436100	529010	13	8	3	5	13	11	12	11	2	2		85531	A0A7M7PQN1_STRPU	Deleted in malignant brain tumors 1 protein	PF00629.27 MAM domain meprin/A5/mu	760	TRUE	TRUE	TRUE	TRUE
7	42	PL34538.1	282.12	28	24	17	24	20	14	14	20	17			607500						12	1	16	15	18	14	7	6	13	9	Oxidation (M)	41874	A0A7M7RBN7_STRPU	Actin	PF00022.23 Actin	376	TRUE	TRUE	TRUE	TRUE
18	21	PL06703.1	282	27	11	22	10	5	13	6	6	6	1819800	4030700	3010400	475840	648640	890140	223170	319470	13	13	6	12	4	2	5	3	3	3	Carbamidomethylation	55230	A0A7M7RC60_STRPU	Methanethiol oxidase	PF05694.15 56kDa selenium binding protein (SBP56)	491	TRUE	TRUE	TRUE	TRUE
9	12	PL31265.1	280.32	46	26	32	8	9	8	10	42	25	1226900	1252700	1446400	476690	41609		3032300	346530	15	15	9	11	3	3	3	3	14	7	Carbamidomethylation	47433	A0A7M7RB25_STRPU	Adenosylhomocysteinase	PF05221.21 S-adenosyl-L-homocysteine hydrolase	431	TRUE	TRUE	TRUE	TRUE
13	57	PL14802.1	279.21	35	34	34	24	24	22	33	26	19	9585700	4619200	7505100	3099300	1557200	4160900	2395000	3764800	11	6	7	7	7	6	6	8	8	7	Carbamidomethylation	31668	A0A7M7PB24_STRPU	Short-chain collagen C4	PF01391.22 Collagen triple helix repeat (20 copies)	295	TRUE	TRUE	TRUE	TRUE
16	17	PL41113.2	257.86	34	25	19	13	10	11	8	27	23	2381100	2159500	1737000	576760	290340	345520	2874000	1147600	12	6	8	6	4	3	3	2	8	7		50051	A0A7M7GHQ8_STRPU	Tubulin beta chain	PF00091.29 Tubulin/FtsZ family GTPase domain	447	TRUE	TRUE	TRUE	TRUE
20	23	PL26953.1	257.2	48	15	17	7	8	25	20	38	35	840940	381370		666120	516090	135190	5035000	2473900	11	11	4	4	2	2	5	4	9	9	Carbamidomethylation	36545	A0A7M7NZ19_STRPU	Glyceraldehyde-3-phosphate dehydrogenase	PF02800.24 Glyceraldehyde 3-phosphate dehydrogenase C-terminal domain	338	TRUE	TRUE	TRUE	TRUE
33	16	PL03755.1	255.86	8	1	1	1	3	5	6	1	0	223520		810020	199050	882290	926150			11	11	2	1	2	3	8	9	1	0		198844	O97375_STRPU	Scavenger receptor cysteine-rich protein type 12 GN=SRCR12	PF00530.22 Scavenger receptor cysteine-rich domain	1886	TRUE	FALSE	TRUE	TRUE
28	35	PL17343.1	248.94	27	12	8	3	3	3	3	24	3	1300100	332690	1162900		13007		4729600	278480	11	11	4	3	1	1	1	1	10	1	Carbamidomethylation	50194	A0A7M7T390_STRPU	Tubulin alpha chain	PF00091.29 Tubulin/FtsZ family GTPase domain	451	TRUE	TRUE	TRUE	TRUE
24	59	PL15790.1	248.02	27	16	7	26	26	23	18	18	3	1417000		9583600	3981500	344830	73073	275050		8	2	3	2	7	6	5	5	5	1	Carbamidomethylation	33406	A0A7M7G009_STRPU	Short-chain collagen C4	PF01391.22 Collagen triple helix repeat (20 copies)	311	TRUE	TRUE	TRUE	TRUE
14	66	PL21312.1	243.31	52	52	33	13	7	3	3	36	23	14784000	8322500	481490				8012800	2561900	10	8	15	10	3	1	1	1	12	7	Carbamidomethylation; Oxidation (M)	23744	A0A7M7NGH2_STRPU	Glutathione transferase	PF14497.10 Glutathione S-transferase C-terminal domain	210	TRUE	TRUE	TRUE	TRUE
17	109	PL31564.1	240.51	10	4	6	8	10	6	7	0	2	634790	1486700	13884000	11651000	570970	380550		26573	8	5	3	5	9	11	6	5	0	1		96261	A0A7M7HJ75_STRPU	Fibrinogen C-terminal domain-containing protein	PF00147.22 Fibrinogen beta and gamma chains C-terminal globular domain	851	TRUE	FALSE	TRUE	TRUE
36	80	PL07127.1	223.61	17	16	12	3	5	6	3	8	13	148510	90844						165080	6	2	5	5	1	2	2	1	3	4		55004	A0A7M7PPM4_STRPU	Aldehyde dehydrogenase domain-containing protein	PF00171.26 Aldehyde dehydrogenase family	508	TRUE	TRUE	TRUE	TRUE
15	81	PL34472.1	219.37	25	25	21	12	12	15	8	25	16	1300000	1304100			68072	33440	1623800	17897	9	6	8	8	3	2	4	2	7	3	Carbamidomethylation	27215	A0A7M7RAD9_STRPU	Uncharacterized protein	PF00106.29 short chain dehydrogenase	248	TRUE	TRUE	TRUE	TRUE
21	19	PL01553.1	218.31	33	21	16	18	14	8	8	16	16	1103500	1521700	2955700	1374500	143290	171420	1061900	338620	9	9	5	5	4	3	2	3	4	4	Carbamidomethylation	45229	A0A7M7TG37_STRPU	Hcy-binding domain-containing protein	PF02574.20 Homocysteine S-methyltransferase	408	TRUE	TRUE	TRUE	TRUE
37	107	PL38654.1	215.68	4	1	4	1	2	1	1	3	3	177320	942050		156810		101910	363270	212440	5	3	2	7	1	3	1	3	3	3	Carbamidomethylation	188812	A0A7M7NCU8_STRPU	SRCR domain-containing protein	PF00530.22 Scavenger receptor cysteine-rich domain	1763	TRUE	TRUE	TRUE	TRUE
23	67	PL17933.1	210.05	33	29	26	6	11	17	19	4	11	1908100	954120	2755300	1580100	1137800	1410900	123110	99710	7	7	8	7	3	4	6	4	1	3	Carbamidomethylation	33248	A0A7M7PGJ5_STRPU	SUEL-type lectin domain-containing protein	PF02140.22 Galactose binding lectin domain	309	TRUE	TRUE	TRUE	TRUE
43	82	PL23070.1	199.96	25	15	18	16	9	9	3	18	3	342500	404400		597110	16949		86071		5	3	3	4	3	2	2	1	4	1		26176	A0A7M7NEX5_STRPU	Glutathione S-transferase	PF14497.10 Glutathione S-transferase C-terminal domain	233	TRUE	TRUE	TRUE	TRUE
45	108	PL10557.3	199.81	35	18	21	25	11	11	11	11	11	3011000	1612400	1407000	643530	538470		719960	322530	6	6	4	3	3	1	2	1	2	2	Carbamidomethylation	17758		PF00241.24 Cofilin/tropomyosin-type actin-binding protein	PF00241.24 Cofilin/tropomyosin-type actin-binding protein	161	TRUE	TRUE	TRUE	TRUE
25	77	PL16192.1	199.73	25	24	19	6	4	4	4	10	8	399620	849810							8	4	7	9	2	1	1	2	3	2	Carbamidomethylation	39597	A0A7M7PH34_STRPU	Hcy-binding domain-containing protein	PF02574.20 Homocysteine S-methyltransferase	360	TRUE	TRUE	TRUE	TRUE
42	88	PL23634.1	196.18	30	5	5	27	19	19	21	9	5			902150	324610	105870	88927			6	3	1	1	5	3	3	4	2	1	Carbamidomethylation	20443	A0A7M7G009_STRPU	A0A7M7G009_STRPU Short-chain collagen C4		187	TRUE	TRUE	TRUE	TRUE
26	78	PL17102.1	196.17	19	14	14	6	4	7	4	18	12							418760	159990	6	1	5	7	2	1	2	2	5	3	Carbamidomethylation	40049	A0A7M7PGW5_STRPU	Hcy-binding domain-containing protein	PF02574.20 Homocysteine S-methyltransferase	360	TRUE	TRUE	TRUE	TRUE
61	125	PL07795.1	195.69	34	28	28	18	11	21	10	21	21									4	1	3	3	2	1	2	1	2	2		16661	A0A7M7PPM4_STRPU	Aldehyde dehydrogenase domain-containing protein	PF00171.26 Aldehyde dehydrogenase family	154	TRUE	TRUE	TRUE	TRUE
32	106	PL19029.1	194.93	19	4	11	13	4	19	9	0	0	23933	128650	1152600	28224	2357200	1108000			6	6	1	3	3	2	9	2	0	0	Carbamidomethylation	45554	A0A7M7LT22_STRPU	SRCR domain-containing protein	PF00530.22 Scavenger receptor cysteine-rich domain	423	TRUE	FALSE	TRUE	TRUE
34	136	PL25464.1	186.21	30	5	5	16	26	30	30	5	5	861880	847400	32312000	19275000	5570700	13828000	1085600	242000	7	6	1	1	3	5	6	7	1	1		20432	A0A7M7PQN1_STRPU	Deleted in malignant brain tumors 1 protein	PF00431.24 CUB domain	182	TRUE	TRUE	TRUE	TRUE
44	135	PL35489.1	185.86	13	13	10	9	3	9	6	13	7	1075700	1586800	4021900	1562800	98769	185610	1361100	392010	4	1	4	3	3	1	3	2	4	2		34554	A0A7M7P327_STRPU	Uncharacterized protein	PF00106.29 short chain dehydrogenase	317	TRUE	TRUE	TRUE	TRUE
49	222	PL40767.1	176.49	10	5	5	10	9	8	9	0	0			3893400						4	1	1	2	4	4	3	4	0	0		42482	A0A7M7HJ75_STRPU	Fibrinogen C-terminal domain-containing protein	PF00147.22 Fibrinogen beta and gamma chains C-terminal globular domain	381	TRUE	FALSE	TRUE	TRUE
68	122	PL20598.1	159.68	5	2	3	3	3	5	3	2	0		227840	909700	486700	1710900	977990			3	3	1	2	2	2	3	2	1	0		102005	A0A7M7NZU0_STRPU	Deleted in malignant brain tumors 1 protein-like	PF00530.22 Scavenger receptor cysteine-rich domain	952	TRUE	FALSE	TRUE	TRUE
71	235	PL14473.1	159.5	15	10	5	5	5	15	10	10	5					97369	23061	55217		4	3	2	1	1	1	4	2	2	1		17275	A0A7M7REZ4_STRPU	C-type lectin domain-containing protein	PF05473.16 UL45 protein carbohydrate-binding C-type lectin-like	154	TRUE	TRUE	TRUE	TRUE
72	163	PL29801.2	159.01	31	21	31	21	14	14	10	14	0	57383	440670	1178600	178160	35183	14433	99984		3	3	2	3	2	1	1	1	1	0	Carbamidomethylation	14696	PROF1_STRPU	Profilin	PF00235.23 Profilin	140	TRUE	FALSE	TRUE	TRUE
52	170	PL23092.1	158.6	18	9	18	14	9	9	9	18	9							17234		3	1	1	3	2	1	1	1	3	1		23367	A0A7M7NFL0_STRPU	Glutathione transferase	PF14497.10 Glutathione S-transferase C-terminal domain	206	TRUE	TRUE	TRUE	TRUE
58	147	PL13748.1	158.1	7	2	2	7	7	4	7	4	2			1294900	303930					4	1	1	1	4	3	2	3	2	1	Carbamidomethylation	41895	A0A7M7G009_STRPU	Short-chain collagen C4	PF01391.22 Collagen triple helix repeat (20 copies)	391	TRUE	TRUE	TRUE	TRUE
50	149	PL14716.1	156.5	19	12	12	4	4	19	19	12	12	241290	347720			169590	381840		41725	3	2	3	3	1	1	4	3	2	2	Carbamidomethylation	19105	A0A7M7G123_STRPU	C-type lectin domain-containing protein	PF00059.25 Lectin C-type domain	171	TRUE	TRUE	TRUE	TRUE
70	209	PL39157.1	139.56	6	6	2	2	2	6	6	0	0	71628	67482	952880	300380	1115600	889950			2	2	2	1	2	1	4	3	0	0	Carbamidomethylation	53282	A0A7M7P1Q8_STRPU	Sushi domain-containing protein	PF00084.24 Sushi repeat (SCR repeat)	480	TRUE	FALSE	TRUE	TRUE
85	229	PL39358.1	138.3	3	1	1	1	1	1	3	1	1						111680			2	1	1	2	1	1	1	3	1	1		104777	A0A7M7NZU0_STRPU	Deleted in malignant brain tumors 1 protein-like	PF00530.22 Scavenger receptor cysteine-rich domain	975	TRUE	TRUE	TRUE	TRUE
75	227	PL36819.1	115.57	16	9	9	9	9	16	16	9	9						297970			2	1	1	1	1	1	3	2	1	1		18831	A0A7M7RHI3_STRPU	C-type lectin domain-containing protein	PF00059.25 Lectin C-type domain	169	TRUE	TRUE	TRUE	TRUE
99	174	PL18035.1	112.34	13	7	7	13	7	7	7	7	0	367500	289580	3764300	1633000	83629	182170	234970		2	2	1	1	2	1	1	1	1	0	Carbamidomethylation	19084	A0A7M7NMD9_STRPU	C-type lectin domain-containing protein	PF00059.25 Lectin C-type domain	167	TRUE	FALSE	TRUE	TRUE
81	230	PL36762.1	105.16	17	17	10	10	10	17	17	10	10	267380				382660	280740			2	1	2	1	1	1	2	2	1	1	Carbamidomethylation	16103	A0A7M7NMI9_STRPU	C-type lectin domain-containing protein	PF00059.25 Lectin C-type domain	143	TRUE	TRUE	TRUE	TRUE
98	191	PL25801.1	103.36	4	2	2	4	2	2	2	2	2			413540						2	1	1	1	2	1	1	1	1	1	Carbamidomethylation	51414	A0A7M7T4K1_STRPU	Uncharacterized protein	PF00084.24 Sushi repeat (SCR repeat)	456	TRUE	TRUE	TRUE	TRUE
59	334	PL13640.1	91.67	3	3	3	3	3	3	3	3	3	2964100	829040	1268100	1336300	677040	402140	634380	171460	1	1	2	3	2	2	2	2	1	1	Carbamidomethylation	63360	A0A7M7P9Z2_STRPU	Deleted in malignant brain tumors 1 protein-like	PF00530.22 Scavenger receptor cysteine-rich domain	604	TRUE	TRUE	TRUE	TRUE
127	393	PL01767.1	80.52	6	6	6	0	6	6	6	0	0	149670	99678		726030	829930	1214100			1	1	1	1	0	1	1	1	0	0	Carbamidomethylation	17055	A0A7M7P0Q8_STRPU	C-type lectin domain-containing protein	PF00059.25 Lectin C-type domain	152	TRUE	FALSE	FALSE	TRUE

## Sheet: Ag_and_TiO2
Protein.Group	Protein.ID	protein	X.10lgP	Coverage....	Coverage.....Ag1	Coverage.....Ag2	Coverage.....PS.C1	Coverage.....PS.C2	Coverage.....PS.N1	Coverage.....PS.N2	Coverage.....TiO2_1	Coverage.....TiO2_2	Area_Ag1	Area_Ag2	Area_PS.C1	Area_PS.C2	Area_PS.N1	Area_PS.N2	Area_TiO2_1	Area_TiO2_2	X.Peptides	X.Unique	Spec_Ag_1	Spec_Ag_2	Spec_PSC_1	Spec_PSC_2	Spec_PSN_1	Spec_PSN_2	Spec_TiO2_1	Spec_TiO2_2	PTM	Avg..Mass	Spur_match	Description_clean	PFAM	length	present_Ag	present_TiO2	present_PSC	present_PSN
1	2	PL26503.2	425.35	45	22	8	36	32	33	31	19	13	7994200	2754300	557320000	243930000	40879000	35121000	10563000	2220600	54	54	23	13	50	46	53	40	23	14	Carbamidomethylation; Oxidation (M)	135792	MYP_STRPU	Major yolk protein	PF00405.21 Transferrin	1190	TRUE	TRUE	TRUE	TRUE
2	4	PL25768.1	424.23	30	14	17	27	27	19	20	15	11	7182800	5829300	115270000	90275000	8071500	16203000	4780300	3291800	46	28	16	22	44	39	26	29	20	15	Carbamidomethylation	156961	O44344_STRPU	Complement component C3 GN=Sp064	PF07678.18 A-macroglobulin TED domain	1421	TRUE	TRUE	TRUE	TRUE
3	1	PL38033.1	390.52	64	64	63	39	34	42	29	39	13	79432000	74554000	59167000	31550000	4737800	3035900	13544000	1718700	43	43	40	45	24	19	20	13	18	6	Carbamidomethylation; Oxidation (M)	58007	A0A7M7P149_STRPU	Catalase	PF00199.23 Catalase	513	TRUE	TRUE	TRUE	TRUE
6	3	PL25890.1	384.04	46	11	15	45	39	14	16	11	12	481030	585090	49979000	17453000	610570	305180	252580	185380	32	18	6	9	33	31	13	11	8	7	Carbamidomethylation	78567	O44344_STRPU	Complement component C3 GN=Sp064	PF00207.26 Alpha-2-macroglobulin family	705	TRUE	TRUE	TRUE	TRUE
4	11	PL26659.4	357.44	68	68	51	54	44	24	24	44	40	63759000	31519000	62212000	38504000	1204400	560830	17354000	3739300	28	17	33	31	29	25	11	9	23	15	Carbamidomethylation; Oxidation (M)	41845	A0A7M7HL75_STRPU	Uncharacterized protein	PF00022.23 Actin	376	TRUE	TRUE	TRUE	TRUE
8	5	PL26274.3	328.1	19	1	3	14	14	7	10	4	2		632580	26519000	15610000	1422500	3975200	477860	84299	27	20	2	6	20	17	11	16	6	3	Carbamidomethylation	192120	A0A7M7PKK5_STRPU	Sushi von Willebrand factor type A EGF and pentraxin domain-containing protein 1	PF00084.24 Sushi repeat (SCR repeat)	1725	TRUE	TRUE	TRUE	TRUE
5	26	PL26138.1	318.65	25	24	25	18	18	24	18	25	25	7921500	12191000	49017000	27090000	8357000	7378300	8084800	6404200	20	16	15	19	12	11	17	14	19	17	Carbamidomethylation	57091	O44344_STRPU	Complement component C3 GN=Sp064	PF07678.18 A-macroglobulin TED domain	509	TRUE	TRUE	TRUE	TRUE
11	18	PL26675.1	307.32	23	5	7	20	18	19	17	3	3	966580	884050	74475000	37685000	10699000	30903000	1436100	529010	13	8	3	5	13	11	12	11	2	2		85531	A0A7M7PQN1_STRPU	Deleted in malignant brain tumors 1 protein	PF00629.27 MAM domain meprin/A5/mu	760	TRUE	TRUE	TRUE	TRUE
7	42	PL34538.1	282.12	28	24	17	24	20	14	14	20	17			607500						12	1	16	15	18	14	7	6	13	9	Oxidation (M)	41874	A0A7M7RBN7_STRPU	Actin	PF00022.23 Actin	376	TRUE	TRUE	TRUE	TRUE
18	21	PL06703.1	282	27	11	22	10	5	13	6	6	6	1819800	4030700	3010400	475840	648640	890140	223170	319470	13	13	6	12	4	2	5	3	3	3	Carbamidomethylation	55230	A0A7M7RC60_STRPU	Methanethiol oxidase	PF05694.15 56kDa selenium binding protein (SBP56)	491	TRUE	TRUE	TRUE	TRUE
9	12	PL31265.1	280.32	46	26	32	8	9	8	10	42	25	1226900	1252700	1446400	476690	41609		3032300	346530	15	15	9	11	3	3	3	3	14	7	Carbamidomethylation	47433	A0A7M7RB25_STRPU	Adenosylhomocysteinase	PF05221.21 S-adenosyl-L-homocysteine hydrolase	431	TRUE	TRUE	TRUE	TRUE
13	57	PL14802.1	279.21	35	34	34	24	24	22	33	26	19	9585700	4619200	7505100	3099300	1557200	4160900	2395000	3764800	11	6	7	7	7	6	6	8	8	7	Carbamidomethylation	31668	A0A7M7PB24_STRPU	Short-chain collagen C4	PF01391.22 Collagen triple helix repeat (20 copies)	295	TRUE	TRUE	TRUE	TRUE
12	15	PL16565.1	270.89	56	53	56	15	8	9	0	28	10	6049600	3866000	2105900	470630	132710		2577200	614160	15	13	15	14	4	2	2	0	8	2	Carbamidomethylation	34691	A0A7M7PLT2_STRPU	Hcy-binding domain-containing protein	PF02574.20 Homocysteine S-methyltransferase	319	TRUE	TRUE	TRUE	FALSE
16	17	PL41113.2	257.86	34	25	19	13	10	11	8	27	23	2381100	2159500	1737000	576760	290340	345520	2874000	1147600	12	6	8	6	4	3	3	2	8	7		50051	A0A7M7GHQ8_STRPU	Tubulin beta chain	PF00091.29 Tubulin/FtsZ family GTPase domain	447	TRUE	TRUE	TRUE	TRUE
20	23	PL26953.1	257.2	48	15	17	7	8	25	20	38	35	840940	381370		666120	516090	135190	5035000	2473900	11	11	4	4	2	2	5	4	9	9	Carbamidomethylation	36545	A0A7M7NZ19_STRPU	Glyceraldehyde-3-phosphate dehydrogenase	PF02800.24 Glyceraldehyde 3-phosphate dehydrogenase C-terminal domain	338	TRUE	TRUE	TRUE	TRUE
28	35	PL17343.1	248.94	27	12	8	3	3	3	3	24	3	1300100	332690	1162900		13007		4729600	278480	11	11	4	3	1	1	1	1	10	1	Carbamidomethylation	50194	A0A7M7T390_STRPU	Tubulin alpha chain	PF00091.29 Tubulin/FtsZ family GTPase domain	451	TRUE	TRUE	TRUE	TRUE
24	59	PL15790.1	248.02	27	16	7	26	26	23	18	18	3	1417000		9583600	3981500	344830	73073	275050		8	2	3	2	7	6	5	5	5	1	Carbamidomethylation	33406	A0A7M7G009_STRPU	Short-chain collagen C4	PF01391.22 Collagen triple helix repeat (20 copies)	311	TRUE	TRUE	TRUE	TRUE
31	43	PL39260.1	244.64	34	31	31	8	15	0	0	11	4	2930600	1487700	1602400	819800			289190	42046	9	9	8	9	2	3	0	0	3	1	Carbamidomethylation	37985	A0A7M7P3F2_STRPU	Prostaglandin reductase 1	PF16884.9 N-terminal domain of oxidoreductase	348	TRUE	TRUE	TRUE	FALSE
14	66	PL21312.1	243.31	52	52	33	13	7	3	3	36	23	14784000	8322500	481490				8012800	2561900	10	8	15	10	3	1	1	1	12	7	Carbamidomethylation; Oxidation (M)	23744	A0A7M7NGH2_STRPU	Glutathione transferase	PF14497.10 Glutathione S-transferase C-terminal domain	210	TRUE	TRUE	TRUE	TRUE
38	46	PL05296.1	227.65	18	18	14	4	0	4	0	8	4	1853200	1568600	242370		12866		680180	70116	7	7	7	5	1	0	2	0	2	1	Carbamidomethylation	52858	A0A7M7HKU1_STRPU	Transketolase	PF02779.28 Transketolase pyrimidine binding domain	495	TRUE	TRUE	FALSE	FALSE
36	80	PL07127.1	223.61	17	16	12	3	5	6	3	8	13	148510	90844						165080	6	2	5	5	1	2	2	1	3	4		55004	A0A7M7PPM4_STRPU	Aldehyde dehydrogenase domain-containing protein	PF00171.26 Aldehyde dehydrogenase family	508	TRUE	TRUE	TRUE	TRUE
15	81	PL34472.1	219.37	25	25	21	12	12	15	8	25	16	1300000	1304100			68072	33440	1623800	17897	9	6	8	8	3	2	4	2	7	3	Carbamidomethylation	27215	A0A7M7RAD9_STRPU	Uncharacterized protein	PF00106.29 short chain dehydrogenase	248	TRUE	TRUE	TRUE	TRUE
21	19	PL01553.1	218.31	33	21	16	18	14	8	8	16	16	1103500	1521700	2955700	1374500	143290	171420	1061900	338620	9	9	5	5	4	3	2	3	4	4	Carbamidomethylation	45229	A0A7M7TG37_STRPU	Hcy-binding domain-containing protein	PF02574.20 Homocysteine S-methyltransferase	408	TRUE	TRUE	TRUE	TRUE
37	107	PL38654.1	215.68	4	1	4	1	2	1	1	3	3	177320	942050		156810		101910	363270	212440	5	3	2	7	1	3	1	3	3	3	Carbamidomethylation	188812	A0A7M7NCU8_STRPU	SRCR domain-containing protein	PF00530.22 Scavenger receptor cysteine-rich domain	1763	TRUE	TRUE	TRUE	TRUE
23	67	PL17933.1	210.05	33	29	26	6	11	17	19	4	11	1908100	954120	2755300	1580100	1137800	1410900	123110	99710	7	7	8	7	3	4	6	4	1	3	Carbamidomethylation	33248	A0A7M7PGJ5_STRPU	SUEL-type lectin domain-containing protein	PF02140.22 Galactose binding lectin domain	309	TRUE	TRUE	TRUE	TRUE
43	82	PL23070.1	199.96	25	15	18	16	9	9	3	18	3	342500	404400		597110	16949		86071		5	3	3	4	3	2	2	1	4	1		26176	A0A7M7NEX5_STRPU	Glutathione S-transferase	PF14497.10 Glutathione S-transferase C-terminal domain	233	TRUE	TRUE	TRUE	TRUE
45	108	PL10557.3	199.81	35	18	21	25	11	11	11	11	11	3011000	1612400	1407000	643530	538470		719960	322530	6	6	4	3	3	1	2	1	2	2	Carbamidomethylation	17758		PF00241.24 Cofilin/tropomyosin-type actin-binding protein	PF00241.24 Cofilin/tropomyosin-type actin-binding protein	161	TRUE	TRUE	TRUE	TRUE
25	77	PL16192.1	199.73	25	24	19	6	4	4	4	10	8	399620	849810							8	4	7	9	2	1	1	2	3	2	Carbamidomethylation	39597	A0A7M7PH34_STRPU	Hcy-binding domain-containing protein	PF02574.20 Homocysteine S-methyltransferase	360	TRUE	TRUE	TRUE	TRUE
42	88	PL23634.1	196.18	30	5	5	27	19	19	21	9	5			902150	324610	105870	88927			6	3	1	1	5	3	3	4	2	1	Carbamidomethylation	20443	A0A7M7G009_STRPU	A0A7M7G009_STRPU Short-chain collagen C4		187	TRUE	TRUE	TRUE	TRUE
26	78	PL17102.1	196.17	19	14	14	6	4	7	4	18	12							418760	159990	6	1	5	7	2	1	2	2	5	3	Carbamidomethylation	40049	A0A7M7PGW5_STRPU	Hcy-binding domain-containing protein	PF02574.20 Homocysteine S-methyltransferase	360	TRUE	TRUE	TRUE	TRUE
61	125	PL07795.1	195.69	34	28	28	18	11	21	10	21	21									4	1	3	3	2	1	2	1	2	2		16661	A0A7M7PPM4_STRPU	Aldehyde dehydrogenase domain-containing protein	PF00171.26 Aldehyde dehydrogenase family	154	TRUE	TRUE	TRUE	TRUE
63	44	PL22679.3	188.6	20	14	5	3	0	0	0	6	3	212430								7	7	5	2	1	0	0	0	2	1	Carbamidomethylation	69938	A0A7M7SVP8_STRPU	Uncharacterized protein	PF01583.24 Adenylylsulphate kinase	620	TRUE	TRUE	FALSE	FALSE
34	136	PL25464.1	186.21	30	5	5	16	26	30	30	5	5	861880	847400	32312000	19275000	5570700	13828000	1085600	242000	7	6	1	1	3	5	6	7	1	1		20432	A0A7M7PQN1_STRPU	Deleted in malignant brain tumors 1 protein	PF00431.24 CUB domain	182	TRUE	TRUE	TRUE	TRUE
44	135	PL35489.1	185.86	13	13	10	9	3	9	6	13	7	1075700	1586800	4021900	1562800	98769	185610	1361100	392010	4	1	4	3	3	1	3	2	4	2		34554	A0A7M7P327_STRPU	Uncharacterized protein	PF00106.29 short chain dehydrogenase	317	TRUE	TRUE	TRUE	TRUE
51	69	PL27975.1	183.17	26	13	13	0	0	3	0	21	16									6	1	3	3	0	0	1	0	5	4		34351	A0A7M7GHQ8_STRPU	Tubulin beta chain	PF03953.21 Tubulin C-terminal domain	301	TRUE	TRUE	FALSE	FALSE
67	87	PL09687.1	173.41	17	5	8	0	0	5	0	15	5	241090	176180			6791		632120	27655	4	4	1	2	0	0	1	0	4	2	Carbamidomethylation	28004	A0A7M7HNY4_STRPU	Malate dehydrogenase	PF00056.27 lactate/malate dehydrogenase D binding domain	261	TRUE	TRUE	FALSE	FALSE
71	235	PL14473.1	159.5	15	10	5	5	5	15	10	10	5					97369	23061	55217		4	3	2	1	1	1	4	2	2	1		17275	A0A7M7REZ4_STRPU	C-type lectin domain-containing protein	PF05473.16 UL45 protein carbohydrate-binding C-type lectin-like	154	TRUE	TRUE	TRUE	TRUE
52	170	PL23092.1	158.6	18	9	18	14	9	9	9	18	9							17234		3	1	1	3	2	1	1	1	3	1		23367	A0A7M7NFL0_STRPU	Glutathione transferase	PF14497.10 Glutathione S-transferase C-terminal domain	206	TRUE	TRUE	TRUE	TRUE
58	147	PL13748.1	158.1	7	2	2	7	7	4	7	4	2			1294900	303930					4	1	1	1	4	3	2	3	2	1	Carbamidomethylation	41895	A0A7M7G009_STRPU	Short-chain collagen C4	PF01391.22 Collagen triple helix repeat (20 copies)	391	TRUE	TRUE	TRUE	TRUE
50	149	PL14716.1	156.5	19	12	12	4	4	19	19	12	12	241290	347720			169590	381840		41725	3	2	3	3	1	1	4	3	2	2	Carbamidomethylation	19105	A0A7M7G123_STRPU	C-type lectin domain-containing protein	PF00059.25 Lectin C-type domain	171	TRUE	TRUE	TRUE	TRUE
80	219	PL37901.1	154.99	10	10	10	10	5	0	0	5	5	42994		534380	345420					2	2	2	2	3	1	0	0	1	2	Carbamidomethylation	45613	A0A7M7T0F1_STRPU	SRCR domain-containing protein	PF00008.31 EGF-like domain	421	TRUE	TRUE	TRUE	FALSE
76	128	PL12954.1	148.23	9	6	9	0	0	2	0	5	6							71650		3	1	3	3	0	0	1	0	2	2		42777	A0A7M7RG64_STRPU	Tubulin beta chain	PF00091.29 Tubulin/FtsZ family GTPase domain	381	TRUE	TRUE	FALSE	FALSE
85	229	PL39358.1	138.3	3	1	1	1	1	1	3	1	1						111680			2	1	1	2	1	1	1	3	1	1		104777	A0A7M7NZU0_STRPU	Deleted in malignant brain tumors 1 protein-like	PF00530.22 Scavenger receptor cysteine-rich domain	975	TRUE	TRUE	TRUE	TRUE
73	143	PL06163.1	134.29	13	9	9	4	2	0	0	2	9	285370	240950						214350	3	2	2	2	1	1	0	0	1	2		42880	A0A7M7PPM4_STRPU	Aldehyde dehydrogenase domain-containing protein	PF00171.26 Aldehyde dehydrogenase family	404	TRUE	TRUE	TRUE	FALSE
75	227	PL36819.1	115.57	16	9	9	9	9	16	16	9	9						297970			2	1	1	1	1	1	3	2	1	1		18831	A0A7M7RHI3_STRPU	C-type lectin domain-containing protein	PF00059.25 Lectin C-type domain	169	TRUE	TRUE	TRUE	TRUE
81	230	PL36762.1	105.16	17	17	10	10	10	17	17	10	10	267380				382660	280740			2	1	2	1	1	1	2	2	1	1	Carbamidomethylation	16103	A0A7M7NMI9_STRPU	C-type lectin domain-containing protein	PF00059.25 Lectin C-type domain	143	TRUE	TRUE	TRUE	TRUE
98	191	PL25801.1	103.36	4	2	2	4	2	2	2	2	2			413540						2	1	1	1	2	1	1	1	1	1	Carbamidomethylation	51414	A0A7M7T4K1_STRPU	Uncharacterized protein	PF00084.24 Sushi repeat (SCR repeat)	456	TRUE	TRUE	TRUE	TRUE
84	236	PL39176.1	93.75	9	5	9	0	4	0	0	5	9	292020	453620					315160	129610	2	1	1	2	0	1	0	0	1	2	Carbamidomethylation	24884	A0A7M7HL06_STRPU	SRCR domain-containing protein	PF00530.22 Scavenger receptor cysteine-rich domain	219	TRUE	TRUE	FALSE	FALSE
120	199	PL05691.1	91.87	2	1	1	1	0	0	0	1	1								49454	2	2	1	1	1	0	0	0	1	1		139013	A0A7M7THK3_STRPU	Heat shock protein 70	PF00012.24 Hsp70 protein	1272	TRUE	TRUE	FALSE	FALSE
59	334	PL13640.1	91.67	3	3	3	3	3	3	3	3	3	2964100	829040	1268100	1336300	677040	402140	634380	171460	1	1	2	3	2	2	2	2	1	1	Carbamidomethylation	63360	A0A7M7P9Z2_STRPU	Deleted in malignant brain tumors 1 protein-like	PF00530.22 Scavenger receptor cysteine-rich domain	604	TRUE	TRUE	TRUE	TRUE

## Sheet: PSC_and_PSN
Protein.Group	Protein.ID	protein	X.10lgP	Coverage....	Coverage.....Ag1	Coverage.....Ag2	Coverage.....PS.C1	Coverage.....PS.C2	Coverage.....PS.N1	Coverage.....PS.N2	Coverage.....TiO2_1	Coverage.....TiO2_2	Area_Ag1	Area_Ag2	Area_PS.C1	Area_PS.C2	Area_PS.N1	Area_PS.N2	Area_TiO2_1	Area_TiO2_2	X.Peptides	X.Unique	Spec_Ag_1	Spec_Ag_2	Spec_PSC_1	Spec_PSC_2	Spec_PSN_1	Spec_PSN_2	Spec_TiO2_1	Spec_TiO2_2	PTM	Avg..Mass	Spur_match	Description_clean	PFAM	length	present_Ag	present_TiO2	present_PSC	present_PSN
1	2	PL26503.2	425.35	45	22	8	36	32	33	31	19	13	7994200	2754300	557320000	243930000	40879000	35121000	10563000	2220600	54	54	23	13	50	46	53	40	23	14	Carbamidomethylation; Oxidation (M)	135792	MYP_STRPU	Major yolk protein	PF00405.21 Transferrin	1190	TRUE	TRUE	TRUE	TRUE
2	4	PL25768.1	424.23	30	14	17	27	27	19	20	15	11	7182800	5829300	115270000	90275000	8071500	16203000	4780300	3291800	46	28	16	22	44	39	26	29	20	15	Carbamidomethylation	156961	O44344_STRPU	Complement component C3 GN=Sp064	PF07678.18 A-macroglobulin TED domain	1421	TRUE	TRUE	TRUE	TRUE
3	1	PL38033.1	390.52	64	64	63	39	34	42	29	39	13	79432000	74554000	59167000	31550000	4737800	3035900	13544000	1718700	43	43	40	45	24	19	20	13	18	6	Carbamidomethylation; Oxidation (M)	58007	A0A7M7P149_STRPU	Catalase	PF00199.23 Catalase	513	TRUE	TRUE	TRUE	TRUE
6	3	PL25890.1	384.04	46	11	15	45	39	14	16	11	12	481030	585090	49979000	17453000	610570	305180	252580	185380	32	18	6	9	33	31	13	11	8	7	Carbamidomethylation	78567	O44344_STRPU	Complement component C3 GN=Sp064	PF00207.26 Alpha-2-macroglobulin family	705	TRUE	TRUE	TRUE	TRUE
4	11	PL26659.4	357.44	68	68	51	54	44	24	24	44	40	63759000	31519000	62212000	38504000	1204400	560830	17354000	3739300	28	17	33	31	29	25	11	9	23	15	Carbamidomethylation; Oxidation (M)	41845	A0A7M7HL75_STRPU	Uncharacterized protein	PF00022.23 Actin	376	TRUE	TRUE	TRUE	TRUE
8	5	PL26274.3	328.1	19	1	3	14	14	7	10	4	2		632580	26519000	15610000	1422500	3975200	477860	84299	27	20	2	6	20	17	11	16	6	3	Carbamidomethylation	192120	A0A7M7PKK5_STRPU	Sushi von Willebrand factor type A EGF and pentraxin domain-containing protein 1	PF00084.24 Sushi repeat (SCR repeat)	1725	TRUE	TRUE	TRUE	TRUE
5	26	PL26138.1	318.65	25	24	25	18	18	24	18	25	25	7921500	12191000	49017000	27090000	8357000	7378300	8084800	6404200	20	16	15	19	12	11	17	14	19	17	Carbamidomethylation	57091	O44344_STRPU	Complement component C3 GN=Sp064	PF07678.18 A-macroglobulin TED domain	509	TRUE	TRUE	TRUE	TRUE
11	18	PL26675.1	307.32	23	5	7	20	18	19	17	3	3	966580	884050	74475000	37685000	10699000	30903000	1436100	529010	13	8	3	5	13	11	12	11	2	2		85531	A0A7M7PQN1_STRPU	Deleted in malignant brain tumors 1 protein	PF00629.27 MAM domain meprin/A5/mu	760	TRUE	TRUE	TRUE	TRUE
7	42	PL34538.1	282.12	28	24	17	24	20	14	14	20	17			607500						12	1	16	15	18	14	7	6	13	9	Oxidation (M)	41874	A0A7M7RBN7_STRPU	Actin	PF00022.23 Actin	376	TRUE	TRUE	TRUE	TRUE
18	21	PL06703.1	282	27	11	22	10	5	13	6	6	6	1819800	4030700	3010400	475840	648640	890140	223170	319470	13	13	6	12	4	2	5	3	3	3	Carbamidomethylation	55230	A0A7M7RC60_STRPU	Methanethiol oxidase	PF05694.15 56kDa selenium binding protein (SBP56)	491	TRUE	TRUE	TRUE	TRUE
9	12	PL31265.1	280.32	46	26	32	8	9	8	10	42	25	1226900	1252700	1446400	476690	41609		3032300	346530	15	15	9	11	3	3	3	3	14	7	Carbamidomethylation	47433	A0A7M7RB25_STRPU	Adenosylhomocysteinase	PF05221.21 S-adenosyl-L-homocysteine hydrolase	431	TRUE	TRUE	TRUE	TRUE
13	57	PL14802.1	279.21	35	34	34	24	24	22	33	26	19	9585700	4619200	7505100	3099300	1557200	4160900	2395000	3764800	11	6	7	7	7	6	6	8	8	7	Carbamidomethylation	31668	A0A7M7PB24_STRPU	Short-chain collagen C4	PF01391.22 Collagen triple helix repeat (20 copies)	295	TRUE	TRUE	TRUE	TRUE
16	17	PL41113.2	257.86	34	25	19	13	10	11	8	27	23	2381100	2159500	1737000	576760	290340	345520	2874000	1147600	12	6	8	6	4	3	3	2	8	7		50051	A0A7M7GHQ8_STRPU	Tubulin beta chain	PF00091.29 Tubulin/FtsZ family GTPase domain	447	TRUE	TRUE	TRUE	TRUE
20	23	PL26953.1	257.2	48	15	17	7	8	25	20	38	35	840940	381370		666120	516090	135190	5035000	2473900	11	11	4	4	2	2	5	4	9	9	Carbamidomethylation	36545	A0A7M7NZ19_STRPU	Glyceraldehyde-3-phosphate dehydrogenase	PF02800.24 Glyceraldehyde 3-phosphate dehydrogenase C-terminal domain	338	TRUE	TRUE	TRUE	TRUE
33	16	PL03755.1	255.86	8	1	1	1	3	5	6	1	0	223520		810020	199050	882290	926150			11	11	2	1	2	3	8	9	1	0		198844	O97375_STRPU	Scavenger receptor cysteine-rich protein type 12 GN=SRCR12	PF00530.22 Scavenger receptor cysteine-rich domain	1886	TRUE	FALSE	TRUE	TRUE
30	28	PL26357.1	254.01	11	0	0	9	7	5	7	1	0				143240	89434	742930			9	2	0	0	7	5	5	6	1	0	Carbamidomethylation	132824	A0A7M7T4K1_STRPU	Uncharacterized protein	PF00084.24 Sushi repeat (SCR repeat)	1182	FALSE	FALSE	TRUE	TRUE
28	35	PL17343.1	248.94	27	12	8	3	3	3	3	24	3	1300100	332690	1162900		13007		4729600	278480	11	11	4	3	1	1	1	1	10	1	Carbamidomethylation	50194	A0A7M7T390_STRPU	Tubulin alpha chain	PF00091.29 Tubulin/FtsZ family GTPase domain	451	TRUE	TRUE	TRUE	TRUE
24	59	PL15790.1	248.02	27	16	7	26	26	23	18	18	3	1417000		9583600	3981500	344830	73073	275050		8	2	3	2	7	6	5	5	5	1	Carbamidomethylation	33406	A0A7M7G009_STRPU	Short-chain collagen C4	PF01391.22 Collagen triple helix repeat (20 copies)	311	TRUE	TRUE	TRUE	TRUE
14	66	PL21312.1	243.31	52	52	33	13	7	3	3	36	23	14784000	8322500	481490				8012800	2561900	10	8	15	10	3	1	1	1	12	7	Carbamidomethylation; Oxidation (M)	23744	A0A7M7NGH2_STRPU	Glutathione transferase	PF14497.10 Glutathione S-transferase C-terminal domain	210	TRUE	TRUE	TRUE	TRUE
17	109	PL31564.1	240.51	10	4	6	8	10	6	7	0	2	634790	1486700	13884000	11651000	570970	380550		26573	8	5	3	5	9	11	6	5	0	1		96261	A0A7M7HJ75_STRPU	Fibrinogen C-terminal domain-containing protein	PF00147.22 Fibrinogen beta and gamma chains C-terminal globular domain	851	TRUE	FALSE	TRUE	TRUE
40	52	PL26357.4	240.01	10	0	0	8	9	5	5	2	0				289570					7	1	0	0	6	5	4	4	1	0	Carbamidomethylation	117418	A0A7M7T4K1_STRPU	Uncharacterized protein	PF00084.24 Sushi repeat (SCR repeat)	1048	FALSE	FALSE	TRUE	TRUE
36	80	PL07127.1	223.61	17	16	12	3	5	6	3	8	13	148510	90844						165080	6	2	5	5	1	2	2	1	3	4		55004	A0A7M7PPM4_STRPU	Aldehyde dehydrogenase domain-containing protein	PF00171.26 Aldehyde dehydrogenase family	508	TRUE	TRUE	TRUE	TRUE
15	81	PL34472.1	219.37	25	25	21	12	12	15	8	25	16	1300000	1304100			68072	33440	1623800	17897	9	6	8	8	3	2	4	2	7	3	Carbamidomethylation	27215	A0A7M7RAD9_STRPU	Uncharacterized protein	PF00106.29 short chain dehydrogenase	248	TRUE	TRUE	TRUE	TRUE
21	19	PL01553.1	218.31	33	21	16	18	14	8	8	16	16	1103500	1521700	2955700	1374500	143290	171420	1061900	338620	9	9	5	5	4	3	2	3	4	4	Carbamidomethylation	45229	A0A7M7TG37_STRPU	Hcy-binding domain-containing protein	PF02574.20 Homocysteine S-methyltransferase	408	TRUE	TRUE	TRUE	TRUE
37	107	PL38654.1	215.68	4	1	4	1	2	1	1	3	3	177320	942050		156810		101910	363270	212440	5	3	2	7	1	3	1	3	3	3	Carbamidomethylation	188812	A0A7M7NCU8_STRPU	SRCR domain-containing protein	PF00530.22 Scavenger receptor cysteine-rich domain	1763	TRUE	TRUE	TRUE	TRUE
23	67	PL17933.1	210.05	33	29	26	6	11	17	19	4	11	1908100	954120	2755300	1580100	1137800	1410900	123110	99710	7	7	8	7	3	4	6	4	1	3	Carbamidomethylation	33248	A0A7M7PGJ5_STRPU	SUEL-type lectin domain-containing protein	PF02140.22 Galactose binding lectin domain	309	TRUE	TRUE	TRUE	TRUE
64	113	PL25989.1	207.45	5	0	0	5	4	1	1	1	0				392770					5	1	0	0	5	3	1	1	1	0	Carbamidomethylation	144683	A0A7M7T4K1_STRPU	Uncharacterized protein	PF00084.24 Sushi repeat (SCR repeat)	1309	FALSE	FALSE	TRUE	TRUE
43	82	PL23070.1	199.96	25	15	18	16	9	9	3	18	3	342500	404400		597110	16949		86071		5	3	3	4	3	2	2	1	4	1		26176	A0A7M7NEX5_STRPU	Glutathione S-transferase	PF14497.10 Glutathione S-transferase C-terminal domain	233	TRUE	TRUE	TRUE	TRUE
45	108	PL10557.3	199.81	35	18	21	25	11	11	11	11	11	3011000	1612400	1407000	643530	538470		719960	322530	6	6	4	3	3	1	2	1	2	2	Carbamidomethylation	17758		PF00241.24 Cofilin/tropomyosin-type actin-binding protein	PF00241.24 Cofilin/tropomyosin-type actin-binding protein	161	TRUE	TRUE	TRUE	TRUE
25	77	PL16192.1	199.73	25	24	19	6	4	4	4	10	8	399620	849810							8	4	7	9	2	1	1	2	3	2	Carbamidomethylation	39597	A0A7M7PH34_STRPU	Hcy-binding domain-containing protein	PF02574.20 Homocysteine S-methyltransferase	360	TRUE	TRUE	TRUE	TRUE
42	88	PL23634.1	196.18	30	5	5	27	19	19	21	9	5			902150	324610	105870	88927			6	3	1	1	5	3	3	4	2	1	Carbamidomethylation	20443	A0A7M7G009_STRPU	A0A7M7G009_STRPU Short-chain collagen C4		187	TRUE	TRUE	TRUE	TRUE
26	78	PL17102.1	196.17	19	14	14	6	4	7	4	18	12							418760	159990	6	1	5	7	2	1	2	2	5	3	Carbamidomethylation	40049	A0A7M7PGW5_STRPU	Hcy-binding domain-containing protein	PF02574.20 Homocysteine S-methyltransferase	360	TRUE	TRUE	TRUE	TRUE
61	125	PL07795.1	195.69	34	28	28	18	11	21	10	21	21									4	1	3	3	2	1	2	1	2	2		16661	A0A7M7PPM4_STRPU	Aldehyde dehydrogenase domain-containing protein	PF00171.26 Aldehyde dehydrogenase family	154	TRUE	TRUE	TRUE	TRUE
32	106	PL19029.1	194.93	19	4	11	13	4	19	9	0	0	23933	128650	1152600	28224	2357200	1108000			6	6	1	3	3	2	9	2	0	0	Carbamidomethylation	45554	A0A7M7LT22_STRPU	SRCR domain-containing protein	PF00530.22 Scavenger receptor cysteine-rich domain	423	TRUE	FALSE	TRUE	TRUE
35	65	PL12927.1	193.42	10	0	2	4	3	7	5	5	0		95133	1429700	906400	684120	470530	194610		6	6	0	1	2	1	4	3	3	0		65170	A0A7M7R912_STRPU	Sulfatase N-terminal domain-containing protein	PF00884.27 Sulfatase	583	FALSE	FALSE	TRUE	TRUE
34	136	PL25464.1	186.21	30	5	5	16	26	30	30	5	5	861880	847400	32312000	19275000	5570700	13828000	1085600	242000	7	6	1	1	3	5	6	7	1	1		20432	A0A7M7PQN1_STRPU	Deleted in malignant brain tumors 1 protein	PF00431.24 CUB domain	182	TRUE	TRUE	TRUE	TRUE
44	135	PL35489.1	185.86	13	13	10	9	3	9	6	13	7	1075700	1586800	4021900	1562800	98769	185610	1361100	392010	4	1	4	3	3	1	3	2	4	2		34554	A0A7M7P327_STRPU	Uncharacterized protein	PF00106.29 short chain dehydrogenase	317	TRUE	TRUE	TRUE	TRUE
49	222	PL40767.1	176.49	10	5	5	10	9	8	9	0	0			3893400						4	1	1	2	4	4	3	4	0	0		42482	A0A7M7HJ75_STRPU	Fibrinogen C-terminal domain-containing protein	PF00147.22 Fibrinogen beta and gamma chains C-terminal globular domain	381	TRUE	FALSE	TRUE	TRUE
78	123	PL26688.1	173.83	6	0	0	4	4	2	2	2	0			47816	245480					4	2	0	0	3	2	1	1	1	0	Carbamidomethylation; Oxidation (M)	109643	A0A7M7T4K1_STRPU	Uncharacterized protein	PF00084.24 Sushi repeat (SCR repeat)	987	FALSE	FALSE	TRUE	TRUE
74	97	PL23896.1	164.38	19	0	0	8	6	15	9	0	0			1681600	505470	554880	344200			5	5	0	0	2	2	4	3	0	0	Carbamidomethylation	45045	Q86RA9_STRPU	Amassin	PF02191.20 Olfactomedin-like domain	396	FALSE	FALSE	TRUE	TRUE
68	122	PL20598.1	159.68	5	2	3	3	3	5	3	2	0		227840	909700	486700	1710900	977990			3	3	1	2	2	2	3	2	1	0		102005	A0A7M7NZU0_STRPU	Deleted in malignant brain tumors 1 protein-like	PF00530.22 Scavenger receptor cysteine-rich domain	952	TRUE	FALSE	TRUE	TRUE
71	235	PL14473.1	159.5	15	10	5	5	5	15	10	10	5					97369	23061	55217		4	3	2	1	1	1	4	2	2	1		17275	A0A7M7REZ4_STRPU	C-type lectin domain-containing protein	PF05473.16 UL45 protein carbohydrate-binding C-type lectin-like	154	TRUE	TRUE	TRUE	TRUE
72	163	PL29801.2	159.01	31	21	31	21	14	14	10	14	0	57383	440670	1178600	178160	35183	14433	99984		3	3	2	3	2	1	1	1	1	0	Carbamidomethylation	14696	PROF1_STRPU	Profilin	PF00235.23 Profilin	140	TRUE	FALSE	TRUE	TRUE
52	170	PL23092.1	158.6	18	9	18	14	9	9	9	18	9							17234		3	1	1	3	2	1	1	1	3	1		23367	A0A7M7NFL0_STRPU	Glutathione transferase	PF14497.10 Glutathione S-transferase C-terminal domain	206	TRUE	TRUE	TRUE	TRUE
58	147	PL13748.1	158.1	7	2	2	7	7	4	7	4	2			1294900	303930					4	1	1	1	4	3	2	3	2	1	Carbamidomethylation	41895	A0A7M7G009_STRPU	Short-chain collagen C4	PF01391.22 Collagen triple helix repeat (20 copies)	391	TRUE	TRUE	TRUE	TRUE
50	149	PL14716.1	156.5	19	12	12	4	4	19	19	12	12	241290	347720			169590	381840		41725	3	2	3	3	1	1	4	3	2	2	Carbamidomethylation	19105	A0A7M7G123_STRPU	C-type lectin domain-containing protein	PF00059.25 Lectin C-type domain	171	TRUE	TRUE	TRUE	TRUE
62	333	PL19999.1	139.72	7	7	0	7	7	7	7	7	0	232550		16183000	5779100	491180	338170	249810		2	2	1	0	4	4	3	3	1	0		27792	A0A7M7PMG7_STRPU	NTR domain-containing protein	PF17791.5 Macroglobulin domain MG3	244	FALSE	FALSE	TRUE	TRUE
70	209	PL39157.1	139.56	6	6	2	2	2	6	6	0	0	71628	67482	952880	300380	1115600	889950			2	2	2	1	2	1	4	3	0	0	Carbamidomethylation	53282	A0A7M7P1Q8_STRPU	Sushi domain-containing protein	PF00084.24 Sushi repeat (SCR repeat)	480	TRUE	FALSE	TRUE	TRUE
85	229	PL39358.1	138.3	3	1	1	1	1	1	3	1	1						111680			2	1	1	2	1	1	1	3	1	1		104777	A0A7M7NZU0_STRPU	Deleted in malignant brain tumors 1 protein-like	PF00530.22 Scavenger receptor cysteine-rich domain	975	TRUE	TRUE	TRUE	TRUE
75	227	PL36819.1	115.57	16	9	9	9	9	16	16	9	9						297970			2	1	1	1	1	1	3	2	1	1		18831	A0A7M7RHI3_STRPU	C-type lectin domain-containing protein	PF00059.25 Lectin C-type domain	169	TRUE	TRUE	TRUE	TRUE
99	174	PL18035.1	112.34	13	7	7	13	7	7	7	7	0	367500	289580	3764300	1633000	83629	182170	234970		2	2	1	1	2	1	1	1	1	0	Carbamidomethylation	19084	A0A7M7NMD9_STRPU	C-type lectin domain-containing protein	PF00059.25 Lectin C-type domain	167	TRUE	FALSE	TRUE	TRUE
81	230	PL36762.1	105.16	17	17	10	10	10	17	17	10	10	267380				382660	280740			2	1	2	1	1	1	2	2	1	1	Carbamidomethylation	16103	A0A7M7NMI9_STRPU	C-type lectin domain-containing protein	PF00059.25 Lectin C-type domain	143	TRUE	TRUE	TRUE	TRUE
98	191	PL25801.1	103.36	4	2	2	4	2	2	2	2	2			413540						2	1	1	1	2	1	1	1	1	1	Carbamidomethylation	51414	A0A7M7T4K1_STRPU	Uncharacterized protein	PF00084.24 Sushi repeat (SCR repeat)	456	TRUE	TRUE	TRUE	TRUE
59	334	PL13640.1	91.67	3	3	3	3	3	3	3	3	3	2964100	829040	1268100	1336300	677040	402140	634380	171460	1	1	2	3	2	2	2	2	1	1	Carbamidomethylation	63360	A0A7M7P9Z2_STRPU	Deleted in malignant brain tumors 1 protein-like	PF00530.22 Scavenger receptor cysteine-rich domain	604	TRUE	TRUE	TRUE	TRUE
139	375	PL26973.1	71.63	5	0	0	5	5	5	5	0	0			6940500	3234500	114790	240800			1	1	0	0	1	1	1	1	0	0		21037	A0A7M7HN49_STRPU	A0A7M7HN49_STRPU Fibrinogen C-terminal domain-containing protein		189	FALSE	FALSE	TRUE	TRUE
128	399	PL16226.1	49.2	2	0	0	2	2	2	2	0	0			553790	133180	74440	114950			1	1	0	0	1	1	1	1	0	0	Carbamidomethylation	46205	A0A7M7GIB0_STRPU	SUEL-type lectin domain-containing protein	PF02140.22 Galactose binding lectin domain	431	FALSE	FALSE	TRUE	TRUE

## Sheet: PSC_and_TiO2
Protein.Group	Protein.ID	protein	X.10lgP	Coverage....	Coverage.....Ag1	Coverage.....Ag2	Coverage.....PS.C1	Coverage.....PS.C2	Coverage.....PS.N1	Coverage.....PS.N2	Coverage.....TiO2_1	Coverage.....TiO2_2	Area_Ag1	Area_Ag2	Area_PS.C1	Area_PS.C2	Area_PS.N1	Area_PS.N2	Area_TiO2_1	Area_TiO2_2	X.Peptides	X.Unique	Spec_Ag_1	Spec_Ag_2	Spec_PSC_1	Spec_PSC_2	Spec_PSN_1	Spec_PSN_2	Spec_TiO2_1	Spec_TiO2_2	PTM	Avg..Mass	Spur_match	Description_clean	PFAM	length	present_Ag	present_TiO2	present_PSC	present_PSN
1	2	PL26503.2	425.35	45	22	8	36	32	33	31	19	13	7994200	2754300	557320000	243930000	40879000	35121000	10563000	2220600	54	54	23	13	50	46	53	40	23	14	Carbamidomethylation; Oxidation (M)	135792	MYP_STRPU	Major yolk protein	PF00405.21 Transferrin	1190	TRUE	TRUE	TRUE	TRUE
2	4	PL25768.1	424.23	30	14	17	27	27	19	20	15	11	7182800	5829300	115270000	90275000	8071500	16203000	4780300	3291800	46	28	16	22	44	39	26	29	20	15	Carbamidomethylation	156961	O44344_STRPU	Complement component C3 GN=Sp064	PF07678.18 A-macroglobulin TED domain	1421	TRUE	TRUE	TRUE	TRUE
3	1	PL38033.1	390.52	64	64	63	39	34	42	29	39	13	79432000	74554000	59167000	31550000	4737800	3035900	13544000	1718700	43	43	40	45	24	19	20	13	18	6	Carbamidomethylation; Oxidation (M)	58007	A0A7M7P149_STRPU	Catalase	PF00199.23 Catalase	513	TRUE	TRUE	TRUE	TRUE
6	3	PL25890.1	384.04	46	11	15	45	39	14	16	11	12	481030	585090	49979000	17453000	610570	305180	252580	185380	32	18	6	9	33	31	13	11	8	7	Carbamidomethylation	78567	O44344_STRPU	Complement component C3 GN=Sp064	PF00207.26 Alpha-2-macroglobulin family	705	TRUE	TRUE	TRUE	TRUE
4	11	PL26659.4	357.44	68	68	51	54	44	24	24	44	40	63759000	31519000	62212000	38504000	1204400	560830	17354000	3739300	28	17	33	31	29	25	11	9	23	15	Carbamidomethylation; Oxidation (M)	41845	A0A7M7HL75_STRPU	Uncharacterized protein	PF00022.23 Actin	376	TRUE	TRUE	TRUE	TRUE
8	5	PL26274.3	328.1	19	1	3	14	14	7	10	4	2		632580	26519000	15610000	1422500	3975200	477860	84299	27	20	2	6	20	17	11	16	6	3	Carbamidomethylation	192120	A0A7M7PKK5_STRPU	Sushi von Willebrand factor type A EGF and pentraxin domain-containing protein 1	PF00084.24 Sushi repeat (SCR repeat)	1725	TRUE	TRUE	TRUE	TRUE
5	26	PL26138.1	318.65	25	24	25	18	18	24	18	25	25	7921500	12191000	49017000	27090000	8357000	7378300	8084800	6404200	20	16	15	19	12	11	17	14	19	17	Carbamidomethylation	57091	O44344_STRPU	Complement component C3 GN=Sp064	PF07678.18 A-macroglobulin TED domain	509	TRUE	TRUE	TRUE	TRUE
11	18	PL26675.1	307.32	23	5	7	20	18	19	17	3	3	966580	884050	74475000	37685000	10699000	30903000	1436100	529010	13	8	3	5	13	11	12	11	2	2		85531	A0A7M7PQN1_STRPU	Deleted in malignant brain tumors 1 protein	PF00629.27 MAM domain meprin/A5/mu	760	TRUE	TRUE	TRUE	TRUE
7	42	PL34538.1	282.12	28	24	17	24	20	14	14	20	17			607500						12	1	16	15	18	14	7	6	13	9	Oxidation (M)	41874	A0A7M7RBN7_STRPU	Actin	PF00022.23 Actin	376	TRUE	TRUE	TRUE	TRUE
18	21	PL06703.1	282	27	11	22	10	5	13	6	6	6	1819800	4030700	3010400	475840	648640	890140	223170	319470	13	13	6	12	4	2	5	3	3	3	Carbamidomethylation	55230	A0A7M7RC60_STRPU	Methanethiol oxidase	PF05694.15 56kDa selenium binding protein (SBP56)	491	TRUE	TRUE	TRUE	TRUE
9	12	PL31265.1	280.32	46	26	32	8	9	8	10	42	25	1226900	1252700	1446400	476690	41609		3032300	346530	15	15	9	11	3	3	3	3	14	7	Carbamidomethylation	47433	A0A7M7RB25_STRPU	Adenosylhomocysteinase	PF05221.21 S-adenosyl-L-homocysteine hydrolase	431	TRUE	TRUE	TRUE	TRUE
13	57	PL14802.1	279.21	35	34	34	24	24	22	33	26	19	9585700	4619200	7505100	3099300	1557200	4160900	2395000	3764800	11	6	7	7	7	6	6	8	8	7	Carbamidomethylation	31668	A0A7M7PB24_STRPU	Short-chain collagen C4	PF01391.22 Collagen triple helix repeat (20 copies)	295	TRUE	TRUE	TRUE	TRUE
12	15	PL16565.1	270.89	56	53	56	15	8	9	0	28	10	6049600	3866000	2105900	470630	132710		2577200	614160	15	13	15	14	4	2	2	0	8	2	Carbamidomethylation	34691	A0A7M7PLT2_STRPU	Hcy-binding domain-containing protein	PF02574.20 Homocysteine S-methyltransferase	319	TRUE	TRUE	TRUE	FALSE
16	17	PL41113.2	257.86	34	25	19	13	10	11	8	27	23	2381100	2159500	1737000	576760	290340	345520	2874000	1147600	12	6	8	6	4	3	3	2	8	7		50051	A0A7M7GHQ8_STRPU	Tubulin beta chain	PF00091.29 Tubulin/FtsZ family GTPase domain	447	TRUE	TRUE	TRUE	TRUE
20	23	PL26953.1	257.2	48	15	17	7	8	25	20	38	35	840940	381370		666120	516090	135190	5035000	2473900	11	11	4	4	2	2	5	4	9	9	Carbamidomethylation	36545	A0A7M7NZ19_STRPU	Glyceraldehyde-3-phosphate dehydrogenase	PF02800.24 Glyceraldehyde 3-phosphate dehydrogenase C-terminal domain	338	TRUE	TRUE	TRUE	TRUE
28	35	PL17343.1	248.94	27	12	8	3	3	3	3	24	3	1300100	332690	1162900		13007		4729600	278480	11	11	4	3	1	1	1	1	10	1	Carbamidomethylation	50194	A0A7M7T390_STRPU	Tubulin alpha chain	PF00091.29 Tubulin/FtsZ family GTPase domain	451	TRUE	TRUE	TRUE	TRUE
24	59	PL15790.1	248.02	27	16	7	26	26	23	18	18	3	1417000		9583600	3981500	344830	73073	275050		8	2	3	2	7	6	5	5	5	1	Carbamidomethylation	33406	A0A7M7G009_STRPU	Short-chain collagen C4	PF01391.22 Collagen triple helix repeat (20 copies)	311	TRUE	TRUE	TRUE	TRUE
31	43	PL39260.1	244.64	34	31	31	8	15	0	0	11	4	2930600	1487700	1602400	819800			289190	42046	9	9	8	9	2	3	0	0	3	1	Carbamidomethylation	37985	A0A7M7P3F2_STRPU	Prostaglandin reductase 1	PF16884.9 N-terminal domain of oxidoreductase	348	TRUE	TRUE	TRUE	FALSE
14	66	PL21312.1	243.31	52	52	33	13	7	3	3	36	23	14784000	8322500	481490				8012800	2561900	10	8	15	10	3	1	1	1	12	7	Carbamidomethylation; Oxidation (M)	23744	A0A7M7NGH2_STRPU	Glutathione transferase	PF14497.10 Glutathione S-transferase C-terminal domain	210	TRUE	TRUE	TRUE	TRUE
36	80	PL07127.1	223.61	17	16	12	3	5	6	3	8	13	148510	90844						165080	6	2	5	5	1	2	2	1	3	4		55004	A0A7M7PPM4_STRPU	Aldehyde dehydrogenase domain-containing protein	PF00171.26 Aldehyde dehydrogenase family	508	TRUE	TRUE	TRUE	TRUE
15	81	PL34472.1	219.37	25	25	21	12	12	15	8	25	16	1300000	1304100			68072	33440	1623800	17897	9	6	8	8	3	2	4	2	7	3	Carbamidomethylation	27215	A0A7M7RAD9_STRPU	Uncharacterized protein	PF00106.29 short chain dehydrogenase	248	TRUE	TRUE	TRUE	TRUE
21	19	PL01553.1	218.31	33	21	16	18	14	8	8	16	16	1103500	1521700	2955700	1374500	143290	171420	1061900	338620	9	9	5	5	4	3	2	3	4	4	Carbamidomethylation	45229	A0A7M7TG37_STRPU	Hcy-binding domain-containing protein	PF02574.20 Homocysteine S-methyltransferase	408	TRUE	TRUE	TRUE	TRUE
37	107	PL38654.1	215.68	4	1	4	1	2	1	1	3	3	177320	942050		156810		101910	363270	212440	5	3	2	7	1	3	1	3	3	3	Carbamidomethylation	188812	A0A7M7NCU8_STRPU	SRCR domain-containing protein	PF00530.22 Scavenger receptor cysteine-rich domain	1763	TRUE	TRUE	TRUE	TRUE
23	67	PL17933.1	210.05	33	29	26	6	11	17	19	4	11	1908100	954120	2755300	1580100	1137800	1410900	123110	99710	7	7	8	7	3	4	6	4	1	3	Carbamidomethylation	33248	A0A7M7PGJ5_STRPU	SUEL-type lectin domain-containing protein	PF02140.22 Galactose binding lectin domain	309	TRUE	TRUE	TRUE	TRUE
43	82	PL23070.1	199.96	25	15	18	16	9	9	3	18	3	342500	404400		597110	16949		86071		5	3	3	4	3	2	2	1	4	1		26176	A0A7M7NEX5_STRPU	Glutathione S-transferase	PF14497.10 Glutathione S-transferase C-terminal domain	233	TRUE	TRUE	TRUE	TRUE
45	108	PL10557.3	199.81	35	18	21	25	11	11	11	11	11	3011000	1612400	1407000	643530	538470		719960	322530	6	6	4	3	3	1	2	1	2	2	Carbamidomethylation	17758		PF00241.24 Cofilin/tropomyosin-type actin-binding protein	PF00241.24 Cofilin/tropomyosin-type actin-binding protein	161	TRUE	TRUE	TRUE	TRUE
25	77	PL16192.1	199.73	25	24	19	6	4	4	4	10	8	399620	849810							8	4	7	9	2	1	1	2	3	2	Carbamidomethylation	39597	A0A7M7PH34_STRPU	Hcy-binding domain-containing protein	PF02574.20 Homocysteine S-methyltransferase	360	TRUE	TRUE	TRUE	TRUE
42	88	PL23634.1	196.18	30	5	5	27	19	19	21	9	5			902150	324610	105870	88927			6	3	1	1	5	3	3	4	2	1	Carbamidomethylation	20443	A0A7M7G009_STRPU	A0A7M7G009_STRPU Short-chain collagen C4		187	TRUE	TRUE	TRUE	TRUE
26	78	PL17102.1	196.17	19	14	14	6	4	7	4	18	12							418760	159990	6	1	5	7	2	1	2	2	5	3	Carbamidomethylation	40049	A0A7M7PGW5_STRPU	Hcy-binding domain-containing protein	PF02574.20 Homocysteine S-methyltransferase	360	TRUE	TRUE	TRUE	TRUE
61	125	PL07795.1	195.69	34	28	28	18	11	21	10	21	21									4	1	3	3	2	1	2	1	2	2		16661	A0A7M7PPM4_STRPU	Aldehyde dehydrogenase domain-containing protein	PF00171.26 Aldehyde dehydrogenase family	154	TRUE	TRUE	TRUE	TRUE
34	136	PL25464.1	186.21	30	5	5	16	26	30	30	5	5	861880	847400	32312000	19275000	5570700	13828000	1085600	242000	7	6	1	1	3	5	6	7	1	1		20432	A0A7M7PQN1_STRPU	Deleted in malignant brain tumors 1 protein	PF00431.24 CUB domain	182	TRUE	TRUE	TRUE	TRUE
44	135	PL35489.1	185.86	13	13	10	9	3	9	6	13	7	1075700	1586800	4021900	1562800	98769	185610	1361100	392010	4	1	4	3	3	1	3	2	4	2		34554	A0A7M7P327_STRPU	Uncharacterized protein	PF00106.29 short chain dehydrogenase	317	TRUE	TRUE	TRUE	TRUE
71	235	PL14473.1	159.5	15	10	5	5	5	15	10	10	5					97369	23061	55217		4	3	2	1	1	1	4	2	2	1		17275	A0A7M7REZ4_STRPU	C-type lectin domain-containing protein	PF05473.16 UL45 protein carbohydrate-binding C-type lectin-like	154	TRUE	TRUE	TRUE	TRUE
52	170	PL23092.1	158.6	18	9	18	14	9	9	9	18	9							17234		3	1	1	3	2	1	1	1	3	1		23367	A0A7M7NFL0_STRPU	Glutathione transferase	PF14497.10 Glutathione S-transferase C-terminal domain	206	TRUE	TRUE	TRUE	TRUE
58	147	PL13748.1	158.1	7	2	2	7	7	4	7	4	2			1294900	303930					4	1	1	1	4	3	2	3	2	1	Carbamidomethylation	41895	A0A7M7G009_STRPU	Short-chain collagen C4	PF01391.22 Collagen triple helix repeat (20 copies)	391	TRUE	TRUE	TRUE	TRUE
50	149	PL14716.1	156.5	19	12	12	4	4	19	19	12	12	241290	347720			169590	381840		41725	3	2	3	3	1	1	4	3	2	2	Carbamidomethylation	19105	A0A7M7G123_STRPU	C-type lectin domain-containing protein	PF00059.25 Lectin C-type domain	171	TRUE	TRUE	TRUE	TRUE
80	219	PL37901.1	154.99	10	10	10	10	5	0	0	5	5	42994		534380	345420					2	2	2	2	3	1	0	0	1	2	Carbamidomethylation	45613	A0A7M7T0F1_STRPU	SRCR domain-containing protein	PF00008.31 EGF-like domain	421	TRUE	TRUE	TRUE	FALSE
85	229	PL39358.1	138.3	3	1	1	1	1	1	3	1	1						111680			2	1	1	2	1	1	1	3	1	1		104777	A0A7M7NZU0_STRPU	Deleted in malignant brain tumors 1 protein-like	PF00530.22 Scavenger receptor cysteine-rich domain	975	TRUE	TRUE	TRUE	TRUE
73	143	PL06163.1	134.29	13	9	9	4	2	0	0	2	9	285370	240950						214350	3	2	2	2	1	1	0	0	1	2		42880	A0A7M7PPM4_STRPU	Aldehyde dehydrogenase domain-containing protein	PF00171.26 Aldehyde dehydrogenase family	404	TRUE	TRUE	TRUE	FALSE
75	227	PL36819.1	115.57	16	9	9	9	9	16	16	9	9						297970			2	1	1	1	1	1	3	2	1	1		18831	A0A7M7RHI3_STRPU	C-type lectin domain-containing protein	PF00059.25 Lectin C-type domain	169	TRUE	TRUE	TRUE	TRUE
81	230	PL36762.1	105.16	17	17	10	10	10	17	17	10	10	267380				382660	280740			2	1	2	1	1	1	2	2	1	1	Carbamidomethylation	16103	A0A7M7NMI9_STRPU	C-type lectin domain-containing protein	PF00059.25 Lectin C-type domain	143	TRUE	TRUE	TRUE	TRUE
98	191	PL25801.1	103.36	4	2	2	4	2	2	2	2	2			413540						2	1	1	1	2	1	1	1	1	1	Carbamidomethylation	51414	A0A7M7T4K1_STRPU	Uncharacterized protein	PF00084.24 Sushi repeat (SCR repeat)	456	TRUE	TRUE	TRUE	TRUE
59	334	PL13640.1	91.67	3	3	3	3	3	3	3	3	3	2964100	829040	1268100	1336300	677040	402140	634380	171460	1	1	2	3	2	2	2	2	1	1	Carbamidomethylation	63360	A0A7M7P9Z2_STRPU	Deleted in malignant brain tumors 1 protein-like	PF00530.22 Scavenger receptor cysteine-rich domain	604	TRUE	TRUE	TRUE	TRUE

## Sheet: PSN_and_TiO2
Protein.Group	Protein.ID	protein	X.10lgP	Coverage....	Coverage.....Ag1	Coverage.....Ag2	Coverage.....PS.C1	Coverage.....PS.C2	Coverage.....PS.N1	Coverage.....PS.N2	Coverage.....TiO2_1	Coverage.....TiO2_2	Area_Ag1	Area_Ag2	Area_PS.C1	Area_PS.C2	Area_PS.N1	Area_PS.N2	Area_TiO2_1	Area_TiO2_2	X.Peptides	X.Unique	Spec_Ag_1	Spec_Ag_2	Spec_PSC_1	Spec_PSC_2	Spec_PSN_1	Spec_PSN_2	Spec_TiO2_1	Spec_TiO2_2	PTM	Avg..Mass	Spur_match	Description_clean	PFAM	length	present_Ag	present_TiO2	present_PSC	present_PSN
1	2	PL26503.2	425.35	45	22	8	36	32	33	31	19	13	7994200	2754300	557320000	243930000	40879000	35121000	10563000	2220600	54	54	23	13	50	46	53	40	23	14	Carbamidomethylation; Oxidation (M)	135792	MYP_STRPU	Major yolk protein	PF00405.21 Transferrin	1190	TRUE	TRUE	TRUE	TRUE
2	4	PL25768.1	424.23	30	14	17	27	27	19	20	15	11	7182800	5829300	115270000	90275000	8071500	16203000	4780300	3291800	46	28	16	22	44	39	26	29	20	15	Carbamidomethylation	156961	O44344_STRPU	Complement component C3 GN=Sp064	PF07678.18 A-macroglobulin TED domain	1421	TRUE	TRUE	TRUE	TRUE
3	1	PL38033.1	390.52	64	64	63	39	34	42	29	39	13	79432000	74554000	59167000	31550000	4737800	3035900	13544000	1718700	43	43	40	45	24	19	20	13	18	6	Carbamidomethylation; Oxidation (M)	58007	A0A7M7P149_STRPU	Catalase	PF00199.23 Catalase	513	TRUE	TRUE	TRUE	TRUE
6	3	PL25890.1	384.04	46	11	15	45	39	14	16	11	12	481030	585090	49979000	17453000	610570	305180	252580	185380	32	18	6	9	33	31	13	11	8	7	Carbamidomethylation	78567	O44344_STRPU	Complement component C3 GN=Sp064	PF00207.26 Alpha-2-macroglobulin family	705	TRUE	TRUE	TRUE	TRUE
4	11	PL26659.4	357.44	68	68	51	54	44	24	24	44	40	63759000	31519000	62212000	38504000	1204400	560830	17354000	3739300	28	17	33	31	29	25	11	9	23	15	Carbamidomethylation; Oxidation (M)	41845	A0A7M7HL75_STRPU	Uncharacterized protein	PF00022.23 Actin	376	TRUE	TRUE	TRUE	TRUE
8	5	PL26274.3	328.1	19	1	3	14	14	7	10	4	2		632580	26519000	15610000	1422500	3975200	477860	84299	27	20	2	6	20	17	11	16	6	3	Carbamidomethylation	192120	A0A7M7PKK5_STRPU	Sushi von Willebrand factor type A EGF and pentraxin domain-containing protein 1	PF00084.24 Sushi repeat (SCR repeat)	1725	TRUE	TRUE	TRUE	TRUE
5	26	PL26138.1	318.65	25	24	25	18	18	24	18	25	25	7921500	12191000	49017000	27090000	8357000	7378300	8084800	6404200	20	16	15	19	12	11	17	14	19	17	Carbamidomethylation	57091	O44344_STRPU	Complement component C3 GN=Sp064	PF07678.18 A-macroglobulin TED domain	509	TRUE	TRUE	TRUE	TRUE
11	18	PL26675.1	307.32	23	5	7	20	18	19	17	3	3	966580	884050	74475000	37685000	10699000	30903000	1436100	529010	13	8	3	5	13	11	12	11	2	2		85531	A0A7M7PQN1_STRPU	Deleted in malignant brain tumors 1 protein	PF00629.27 MAM domain meprin/A5/mu	760	TRUE	TRUE	TRUE	TRUE
7	42	PL34538.1	282.12	28	24	17	24	20	14	14	20	17			607500						12	1	16	15	18	14	7	6	13	9	Oxidation (M)	41874	A0A7M7RBN7_STRPU	Actin	PF00022.23 Actin	376	TRUE	TRUE	TRUE	TRUE
18	21	PL06703.1	282	27	11	22	10	5	13	6	6	6	1819800	4030700	3010400	475840	648640	890140	223170	319470	13	13	6	12	4	2	5	3	3	3	Carbamidomethylation	55230	A0A7M7RC60_STRPU	Methanethiol oxidase	PF05694.15 56kDa selenium binding protein (SBP56)	491	TRUE	TRUE	TRUE	TRUE
9	12	PL31265.1	280.32	46	26	32	8	9	8	10	42	25	1226900	1252700	1446400	476690	41609		3032300	346530	15	15	9	11	3	3	3	3	14	7	Carbamidomethylation	47433	A0A7M7RB25_STRPU	Adenosylhomocysteinase	PF05221.21 S-adenosyl-L-homocysteine hydrolase	431	TRUE	TRUE	TRUE	TRUE
13	57	PL14802.1	279.21	35	34	34	24	24	22	33	26	19	9585700	4619200	7505100	3099300	1557200	4160900	2395000	3764800	11	6	7	7	7	6	6	8	8	7	Carbamidomethylation	31668	A0A7M7PB24_STRPU	Short-chain collagen C4	PF01391.22 Collagen triple helix repeat (20 copies)	295	TRUE	TRUE	TRUE	TRUE
16	17	PL41113.2	257.86	34	25	19	13	10	11	8	27	23	2381100	2159500	1737000	576760	290340	345520	2874000	1147600	12	6	8	6	4	3	3	2	8	7		50051	A0A7M7GHQ8_STRPU	Tubulin beta chain	PF00091.29 Tubulin/FtsZ family GTPase domain	447	TRUE	TRUE	TRUE	TRUE
20	23	PL26953.1	257.2	48	15	17	7	8	25	20	38	35	840940	381370		666120	516090	135190	5035000	2473900	11	11	4	4	2	2	5	4	9	9	Carbamidomethylation	36545	A0A7M7NZ19_STRPU	Glyceraldehyde-3-phosphate dehydrogenase	PF02800.24 Glyceraldehyde 3-phosphate dehydrogenase C-terminal domain	338	TRUE	TRUE	TRUE	TRUE
28	35	PL17343.1	248.94	27	12	8	3	3	3	3	24	3	1300100	332690	1162900		13007		4729600	278480	11	11	4	3	1	1	1	1	10	1	Carbamidomethylation	50194	A0A7M7T390_STRPU	Tubulin alpha chain	PF00091.29 Tubulin/FtsZ family GTPase domain	451	TRUE	TRUE	TRUE	TRUE
24	59	PL15790.1	248.02	27	16	7	26	26	23	18	18	3	1417000		9583600	3981500	344830	73073	275050		8	2	3	2	7	6	5	5	5	1	Carbamidomethylation	33406	A0A7M7G009_STRPU	Short-chain collagen C4	PF01391.22 Collagen triple helix repeat (20 copies)	311	TRUE	TRUE	TRUE	TRUE
14	66	PL21312.1	243.31	52	52	33	13	7	3	3	36	23	14784000	8322500	481490				8012800	2561900	10	8	15	10	3	1	1	1	12	7	Carbamidomethylation; Oxidation (M)	23744	A0A7M7NGH2_STRPU	Glutathione transferase	PF14497.10 Glutathione S-transferase C-terminal domain	210	TRUE	TRUE	TRUE	TRUE
36	80	PL07127.1	223.61	17	16	12	3	5	6	3	8	13	148510	90844						165080	6	2	5	5	1	2	2	1	3	4		55004	A0A7M7PPM4_STRPU	Aldehyde dehydrogenase domain-containing protein	PF00171.26 Aldehyde dehydrogenase family	508	TRUE	TRUE	TRUE	TRUE
15	81	PL34472.1	219.37	25	25	21	12	12	15	8	25	16	1300000	1304100			68072	33440	1623800	17897	9	6	8	8	3	2	4	2	7	3	Carbamidomethylation	27215	A0A7M7RAD9_STRPU	Uncharacterized protein	PF00106.29 short chain dehydrogenase	248	TRUE	TRUE	TRUE	TRUE
21	19	PL01553.1	218.31	33	21	16	18	14	8	8	16	16	1103500	1521700	2955700	1374500	143290	171420	1061900	338620	9	9	5	5	4	3	2	3	4	4	Carbamidomethylation	45229	A0A7M7TG37_STRPU	Hcy-binding domain-containing protein	PF02574.20 Homocysteine S-methyltransferase	408	TRUE	TRUE	TRUE	TRUE
37	107	PL38654.1	215.68	4	1	4	1	2	1	1	3	3	177320	942050		156810		101910	363270	212440	5	3	2	7	1	3	1	3	3	3	Carbamidomethylation	188812	A0A7M7NCU8_STRPU	SRCR domain-containing protein	PF00530.22 Scavenger receptor cysteine-rich domain	1763	TRUE	TRUE	TRUE	TRUE
23	67	PL17933.1	210.05	33	29	26	6	11	17	19	4	11	1908100	954120	2755300	1580100	1137800	1410900	123110	99710	7	7	8	7	3	4	6	4	1	3	Carbamidomethylation	33248	A0A7M7PGJ5_STRPU	SUEL-type lectin domain-containing protein	PF02140.22 Galactose binding lectin domain	309	TRUE	TRUE	TRUE	TRUE
43	82	PL23070.1	199.96	25	15	18	16	9	9	3	18	3	342500	404400		597110	16949		86071		5	3	3	4	3	2	2	1	4	1		26176	A0A7M7NEX5_STRPU	Glutathione S-transferase	PF14497.10 Glutathione S-transferase C-terminal domain	233	TRUE	TRUE	TRUE	TRUE
45	108	PL10557.3	199.81	35	18	21	25	11	11	11	11	11	3011000	1612400	1407000	643530	538470		719960	322530	6	6	4	3	3	1	2	1	2	2	Carbamidomethylation	17758		PF00241.24 Cofilin/tropomyosin-type actin-binding protein	PF00241.24 Cofilin/tropomyosin-type actin-binding protein	161	TRUE	TRUE	TRUE	TRUE
25	77	PL16192.1	199.73	25	24	19	6	4	4	4	10	8	399620	849810							8	4	7	9	2	1	1	2	3	2	Carbamidomethylation	39597	A0A7M7PH34_STRPU	Hcy-binding domain-containing protein	PF02574.20 Homocysteine S-methyltransferase	360	TRUE	TRUE	TRUE	TRUE
42	88	PL23634.1	196.18	30	5	5	27	19	19	21	9	5			902150	324610	105870	88927			6	3	1	1	5	3	3	4	2	1	Carbamidomethylation	20443	A0A7M7G009_STRPU	A0A7M7G009_STRPU Short-chain collagen C4		187	TRUE	TRUE	TRUE	TRUE
26	78	PL17102.1	196.17	19	14	14	6	4	7	4	18	12							418760	159990	6	1	5	7	2	1	2	2	5	3	Carbamidomethylation	40049	A0A7M7PGW5_STRPU	Hcy-binding domain-containing protein	PF02574.20 Homocysteine S-methyltransferase	360	TRUE	TRUE	TRUE	TRUE
61	125	PL07795.1	195.69	34	28	28	18	11	21	10	21	21									4	1	3	3	2	1	2	1	2	2		16661	A0A7M7PPM4_STRPU	Aldehyde dehydrogenase domain-containing protein	PF00171.26 Aldehyde dehydrogenase family	154	TRUE	TRUE	TRUE	TRUE
34	136	PL25464.1	186.21	30	5	5	16	26	30	30	5	5	861880	847400	32312000	19275000	5570700	13828000	1085600	242000	7	6	1	1	3	5	6	7	1	1		20432	A0A7M7PQN1_STRPU	Deleted in malignant brain tumors 1 protein	PF00431.24 CUB domain	182	TRUE	TRUE	TRUE	TRUE
44	135	PL35489.1	185.86	13	13	10	9	3	9	6	13	7	1075700	1586800	4021900	1562800	98769	185610	1361100	392010	4	1	4	3	3	1	3	2	4	2		34554	A0A7M7P327_STRPU	Uncharacterized protein	PF00106.29 short chain dehydrogenase	317	TRUE	TRUE	TRUE	TRUE
71	235	PL14473.1	159.5	15	10	5	5	5	15	10	10	5					97369	23061	55217		4	3	2	1	1	1	4	2	2	1		17275	A0A7M7REZ4_STRPU	C-type lectin domain-containing protein	PF05473.16 UL45 protein carbohydrate-binding C-type lectin-like	154	TRUE	TRUE	TRUE	TRUE
52	170	PL23092.1	158.6	18	9	18	14	9	9	9	18	9							17234		3	1	1	3	2	1	1	1	3	1		23367	A0A7M7NFL0_STRPU	Glutathione transferase	PF14497.10 Glutathione S-transferase C-terminal domain	206	TRUE	TRUE	TRUE	TRUE
58	147	PL13748.1	158.1	7	2	2	7	7	4	7	4	2			1294900	303930					4	1	1	1	4	3	2	3	2	1	Carbamidomethylation	41895	A0A7M7G009_STRPU	Short-chain collagen C4	PF01391.22 Collagen triple helix repeat (20 copies)	391	TRUE	TRUE	TRUE	TRUE
50	149	PL14716.1	156.5	19	12	12	4	4	19	19	12	12	241290	347720			169590	381840		41725	3	2	3	3	1	1	4	3	2	2	Carbamidomethylation	19105	A0A7M7G123_STRPU	C-type lectin domain-containing protein	PF00059.25 Lectin C-type domain	171	TRUE	TRUE	TRUE	TRUE
85	229	PL39358.1	138.3	3	1	1	1	1	1	3	1	1						111680			2	1	1	2	1	1	1	3	1	1		104777	A0A7M7NZU0_STRPU	Deleted in malignant brain tumors 1 protein-like	PF00530.22 Scavenger receptor cysteine-rich domain	975	TRUE	TRUE	TRUE	TRUE
75	227	PL36819.1	115.57	16	9	9	9	9	16	16	9	9						297970			2	1	1	1	1	1	3	2	1	1		18831	A0A7M7RHI3_STRPU	C-type lectin domain-containing protein	PF00059.25 Lectin C-type domain	169	TRUE	TRUE	TRUE	TRUE
81	230	PL36762.1	105.16	17	17	10	10	10	17	17	10	10	267380				382660	280740			2	1	2	1	1	1	2	2	1	1	Carbamidomethylation	16103	A0A7M7NMI9_STRPU	C-type lectin domain-containing protein	PF00059.25 Lectin C-type domain	143	TRUE	TRUE	TRUE	TRUE
126	331	PL17235.1	103.7	7	7	0	0	0	7	7	7	7	537970				117250	227280	451880	194220	1	1	1	0	0	0	1	1	1	1	Carbamidomethylation	25999	A0A7M7HJI8_STRPU	LamG-like jellyroll fold domain-containing protein	PF13385.10 Concanavalin A-like lectin/glucanases superfamily	240	FALSE	TRUE	FALSE	TRUE
98	191	PL25801.1	103.36	4	2	2	4	2	2	2	2	2			413540						2	1	1	1	2	1	1	1	1	1	Carbamidomethylation	51414	A0A7M7T4K1_STRPU	Uncharacterized protein	PF00084.24 Sushi repeat (SCR repeat)	456	TRUE	TRUE	TRUE	TRUE
59	334	PL13640.1	91.67	3	3	3	3	3	3	3	3	3	2964100	829040	1268100	1336300	677040	402140	634380	171460	1	1	2	3	2	2	2	2	1	1	Carbamidomethylation	63360	A0A7M7P9Z2_STRPU	Deleted in malignant brain tumors 1 protein-like	PF00530.22 Scavenger receptor cysteine-rich domain	604	TRUE	TRUE	TRUE	TRUE
104	339	PL29577.1	88.01	2	0	2	2	0	2	2	2	2			39067		19386				1	1	0	1	1	0	1	1	1	1		62856	A0A7M7N148_STRPU	Succinate dehydrogenase [ubiquinone] flavoprotein subunit mitochondrial	PF00890.28 FAD binding domain	568	FALSE	TRUE	FALSE	TRUE

[truncated: 1 more sheets: Shared_by_all]
