# Supplementary material
Source: Royal Society of Chemistry journal article supplement (doi:10.1039/d5en00836k)
Supplement: d5en00836k2.pdf [file d5en00836k2.pdf]

## SUPPLEMENTARY INFORMATION

### Linking Protein Corona Composition to Ecotoxicological Outcomes: A comparative Study of different Engineered Nanoparticles in Mediterranean Sea Urchin *Paracentrotus lividus*

Patrizia Romano<sup>1,2\*</sup>, Arianna Bellingeri<sup>1</sup>, Marco Morelli<sup>3</sup>, Rosanna Lucignano<sup>3</sup>, Eugenio Paccagnini<sup>4</sup>, Iole Venditti<sup>5</sup>, Andrea Carpentieri<sup>3</sup>, Pietro Lupetti<sup>4</sup>, Ilaria Corsi<sup>1†</sup> and Serena Leone<sup>2†</sup>

<sup>1</sup> Department of Physical, Earth and Environmental Sciences, University of Siena, Italy.

<sup>2</sup> Department of Biology and Evolution of Marine Organisms (BEOM), Stazione Zoologica Anton Dohrn, Naples, Italy.

<sup>3</sup> Department of Chemical Sciences, University of Naples "Federico II", Italy

<sup>4</sup> Department of Life Sciences, University of Siena, Italy

<sup>5</sup> Department of Sciences, Roma Tre University of Rome, Italy

† These authors contributed equally and are listed alphabetically.

\* corresponding: patrizia.romano@student.unisi.it

**Table SII.** Mean hydrodynamic diameter (Z-Ave), polydispersity index (PDI), and zeta potential (Z-pot) values of PS-NH<sub>2</sub> NPs in Milli-Q (T0) and in CF at different time points (T0, 12 h, 24 h), are shown in Figure 1A-A2. The data refer to both hard and soft corona conditions, as well as to samples washed twice with PBS, where only the hard corona remains. Data are presented as mean ± standard deviation (SD) (n = 3, 1 biological replicate with 3 technical replicates each).

|                    | Medium       | Time | Z-Ave (d.nm)    | PDI         | Z-pot (mV)    |
|--------------------|--------------|------|-----------------|-------------|---------------|
| PS-NH <sub>2</sub> | Milli-Q      | T0   | 63.22 ± 1.34    | 0.16 ± 0.02 | 47.2 ± 1.35   |
|                    |              |      |                 |             |               |
|                    | CF Hard+Soft | T0   | 208.4 ± 3.70    | 0.19 ± 0.02 | -11.50 ± 4.04 |
|                    |              | 12h  | 881.50 ± 142.9  | 0.28 ± 0.08 | -10.40 ± 2.79 |
|                    |              | 24h  | 151.40 ± 2.55   | 0.25 ± 0.02 | -8.16 ± 1.89  |
|                    | CF Hard      | T0   | 208.4 ± 3.70    | 0.19 ± 0.02 | -11.50 ± 4.04 |
|                    |              | 12h  | 1073.00 ± 49.57 | 0.34 ± 0.07 | -22.80 ± 1.8  |
|                    |              | 24h  | 602.00 ± 157.9  | 0.99 ± 0.01 | -22.1 ± 0.76  |

**Table SI2.** Mean hydrodynamic diameter (Z-Ave), polydispersity index (PDI), and zeta potential (Z-pot) values PS-COOH NPs in Milli-Q (T0) and in CF at different time points (T0, 12 h, 24 h), are shown in Figure 1B-B2. The data refer to both hard and soft corona conditions, as well as to samples washed twice with PBS, where only the

hard corona remains. Data are presented as mean  $\pm$  standard deviation (SD) (n = 3, 1 biological replicate with 3 technical replicates each).

|         | Medium       | Time | Z-Ave (d.nm)         | PDI             | Z-pot (mV)        |
|---------|--------------|------|----------------------|-----------------|-------------------|
| PS-COOH | Milli-Q      | T0   | 81.02 $\pm$ 1.05     | 0.16 $\pm$ 0.04 | -39.60 $\pm$ 0.91 |
|         |              |      |                      |                 |                   |
|         | CF Hard+Soft | T0   | 213.70 $\pm$ 5.71    | 0.25 $\pm$ 0.01 | -14.00 $\pm$ 3.74 |
|         |              | 12h  | 361.20 $\pm$ 33.23   | 0.73 $\pm$ 0.23 | -11.70 $\pm$ 3.10 |
|         |              | 24h  | 146.90 $\pm$ 3.53    | 0.21 $\pm$ 0.03 | -9.26 $\pm$ 4.49  |
|         | CF Hard      | T0   | 213.70 $\pm$ 5.71    | 0.25 $\pm$ 0.01 | -14.00 $\pm$ 3.74 |
|         |              | 12h  | 1347.00 $\pm$ 111.50 | 0.72 $\pm$ 0.47 | -21.40 $\pm$ 0.72 |
|         |              | 24h  | 530.00 $\pm$ 8.41    | 0.81 $\pm$ 0.06 | -25.3 $\pm$ 1.40  |
|         |              |      |                      |                 |                   |

**Table SI3.** Mean hydrodynamic diameter (Z-Ave), polydispersity index (PDI), and zeta potential (Z-pot) values AgcitLcys NPs in Milli-Q (T0) and in CF at different time points (T0, 12 h, 24 h), are shown in Figure 1C-C2. The data refer to both hard and soft corona conditions, as well as to samples washed twice with PBS, where only the hard corona remains. Data are presented as mean  $\pm$  standard deviation (SD) (n = 3, 1 biological replicate with 3 technical replicates each).

|           | Medium       | Time | Z-Ave (d.nm)        | PDI              | Z-pot (mV)        |
|-----------|--------------|------|---------------------|------------------|-------------------|
| AgcitLcys | Milli-Q      | T0   | 56.81 $\pm$ 2.28    | 0.64 $\pm$ 0.05  | -51.80 $\pm$ 0.75 |
|           |              |      |                     |                  |                   |
|           | CF Hard+Soft | T0   | 307.80 $\pm$ 8.19   | 0.26 $\pm$ 0.02  | -9.87 $\pm$ 0.76  |
|           |              | 12h  | 117.10 $\pm$ 2.59   | 0.64 $\pm$ 0.08  | -11.50 $\pm$ 3.36 |
|           |              | 24h  | 149.59 $\pm$ 2.25   | 0.62 $\pm$ 0.04  | -11.20 $\pm$ 2.27 |
|           | CF Hard      | T0   | 307.80 $\pm$ 8.19   | 0.26 $\pm$ 0.02  | -9.87 $\pm$ 0.76  |
|           |              | 12h  | 788.20 $\pm$ 163.10 | 0.93 $\pm$ 0.071 | -19.60 $\pm$ 0.99 |
|           |              | 24h  | 484.00 $\pm$ 28.98  | 0.71 $\pm$ 0.05  | -25.3 $\pm$ 1.40  |
|           |              |      |                     |                  |                   |

**Table SI4.** Mean hydrodynamic diameter (Z-Ave), polydispersity index (PDI), and zeta potential (Z-pot) values TiO<sub>2</sub> NPs in Milli-Q (T0) and in CF at different time points (T0, 12 h, 24 h), are shown in Figure 1D-D2. The data refer to both hard and soft corona conditions, as well as to samples washed twice with PBS, where only the hard corona remains. Data are presented as mean  $\pm$  standard deviation (SD) (n = 3, 1 biological replicate with 3 technical replicates each).

|                  | Medium       | Time | Z-Ave (d.nm)        | PDI             | Z-pot (mV)        |
|------------------|--------------|------|---------------------|-----------------|-------------------|
| TiO <sub>2</sub> | Milli-Q      | T0   | 395.2 $\pm$ 18.59   | 0.42 $\pm$ 0.09 | -12.03 $\pm$ 0.25 |
|                  |              |      |                     |                 |                   |
|                  | CF Hard+Soft | T0   | 385.00 $\pm$ 44.14  | 0.52 $\pm$ 0.09 | -9.36 $\pm$ 3.33  |
|                  |              | 12h  | 293.90 $\pm$ 33.51  | 0.70 $\pm$ 0.12 | -7.33 $\pm$ 5.24  |
|                  |              | 24h  | 237.00 $\pm$ 3.93   | 0.34 $\pm$ 0.05 | -10.6 $\pm$ 4.24  |
|                  | CF Hard      | T0   | 385.00 $\pm$ 44.14  | 0.52 $\pm$ 0.09 | -9.36 $\pm$ 3.33  |
|                  |              | 12h  | 1237.00 $\pm$ 178.4 | 1               | -25.10 $\pm$ 0.45 |
|                  |              | 24h  | 1228.00 $\pm$ 469.3 | 0.95 $\pm$ 0.09 | -26.6 $\pm$ 0.58  |
|                  |              |      |                     |                 |                   |

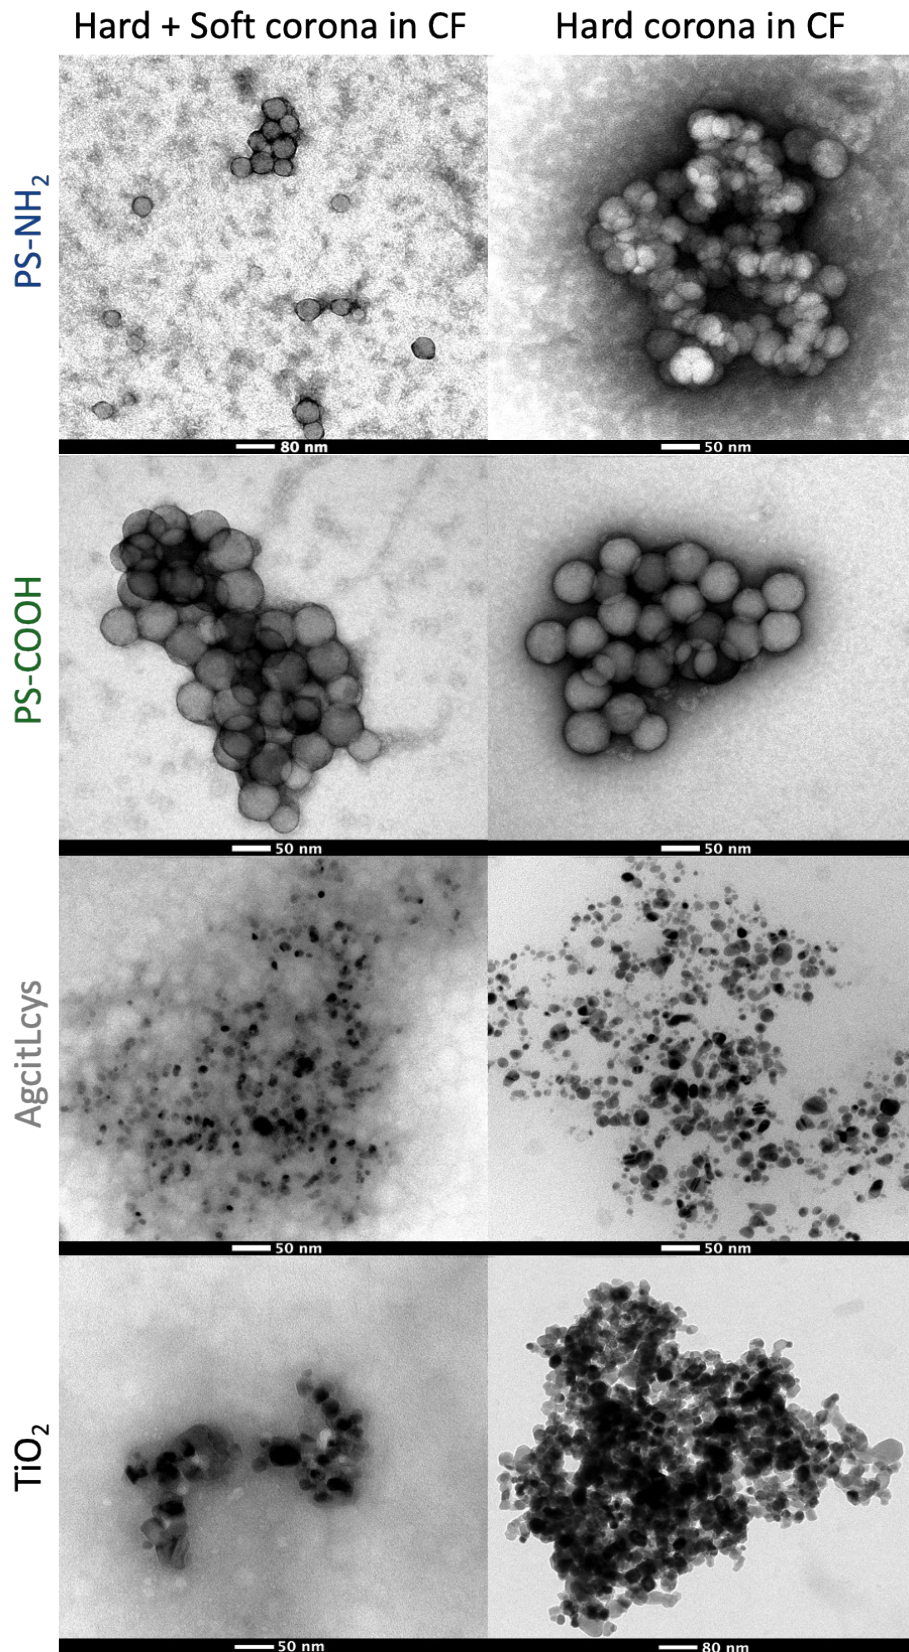

**Figure S11.** Morphological and dimensional characterization of PS-NH<sub>2</sub>, PS-COOH, AgcitLcys, and TiO<sub>2</sub> NPs using TEM. Panel show the NPs after 24 h of incubation in CF of *P. lividus*, highlighting the formation of the protein corona (hard + soft) and following three PBS washes, in which only the hard corona remains after removal of the loosely bound proteins.

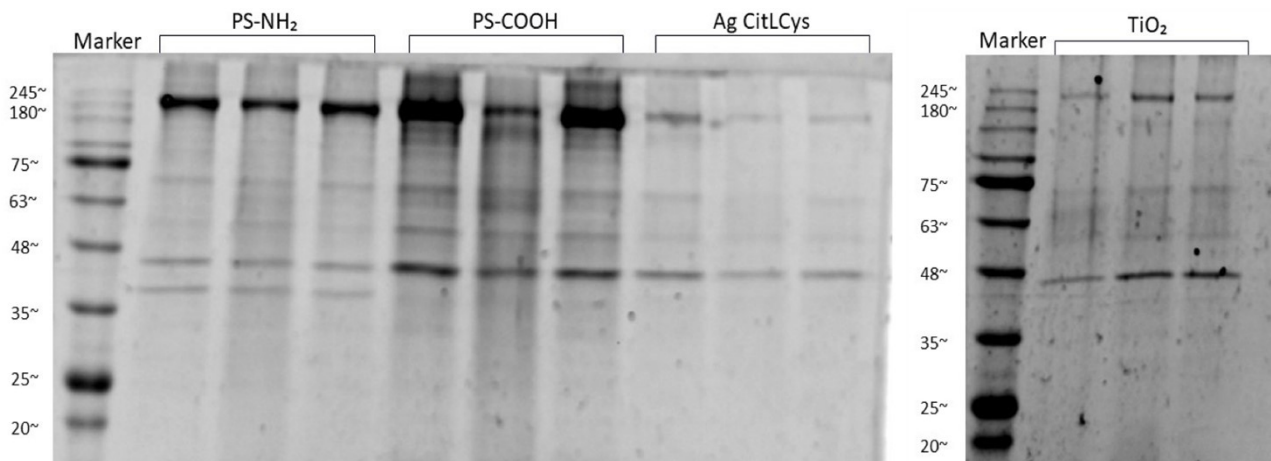

**Figure SI2.** SDS-PAGE (12%) showing the protein coronas formed on different NP types after 24 h incubation in CF of *P. lividus*. Lanes 2–4: PS-NH<sub>2</sub> NPs; lanes 5–7: PS-COOH NPs; lanes 8–10: AgcitLcys NPs; lanes 12–14: TiO<sub>2</sub> NPs. Each lane represents an independent replicate of the protein corona isolated from the respective NP type. Proteins were separated under reducing conditions and visualized by Coomassie Brilliant Blue staining. Triplicate analysis was performed for each NP type to evaluate the reproducibility of the corona composition. Molecular weight markers (MW) are shown on the left of each gel (in kDa).

**Table SI5.** Theoretical estimates of particle number for each NP type (PS-COOH, PS-NH<sub>2</sub>, AgcitLcys and TiO<sub>2</sub>) calculated from the nominal particle diameter at the two exposure concentrations used (25 µg/L and 25 µg/mL), using a mass-to-particle-number conversion and assuming spherical, homogeneous, non-aggregated particles.

| NP                   | Diameter | 25 µg/L               | 25 µg/mL              |
|----------------------|----------|-----------------------|-----------------------|
| PS-COOH              | 62 nm    | $1.89 \times 10^{11}$ | $1.89 \times 10^{14}$ |
| PS-NH <sub>2</sub>   | 50 nm    | $3.64 \times 10^{11}$ | $3.64 \times 10^{14}$ |
| AgNP                 | 8.3 nm   | $7.96 \times 10^{12}$ | $7.96 \times 10^{15}$ |
| TiO <sub>2</sub> P25 | 23 nm    | $1.01 \times 10^{12}$ | $1.01 \times 10^{15}$ |

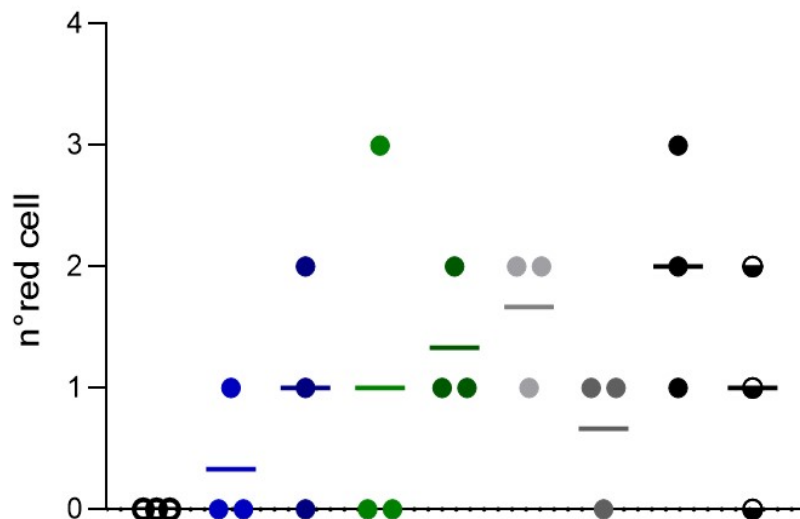

**Figure SI3.** Number of red cells in *P. lividus* coelomocytes following 4 h exposure to NPs in CF. Each dot represents the count of red cells per field in a biological replicate. Horizontal lines show mean values for each condition. Conditions labeled “a” correspond to 25 µg/L exposures and “b” to 25 µg/mL exposures.

**Table SI6.** Number of red cells in *P. lividus* coelomocytes after 4 h exposure to NPs in CF. Values represent the number of red cells per field in three biological replicates.

| Samples                         | n° Red Cell |       |       |
|---------------------------------|-------------|-------|-------|
|                                 | Rep 1       | Rep 2 | Rep 3 |
| CTRL                            | 0           | 0     | 0     |
| PS-NH <sub>2</sub> <sup>a</sup> | 1           | 0     | 0     |
| PS-NH <sub>2</sub> <sup>b</sup> | 0           | 2     | 1     |
| PS-COOH <sup>a</sup>            | 0           | 3     | 0     |
| PS-COOH <sup>b</sup>            | 1           | 1     | 2     |
| AgcitLcys <sup>a</sup>          | 2           | 2     | 1     |
| AgcitLcys <sup>b</sup>          | 1           | 0     | 1     |
| TiO <sub>2</sub> <sup>a</sup>   | 1           | 3     | 2     |
| TiO <sub>2</sub> <sup>b</sup>   | 0           | 2     | 1     |

<sup>a</sup> exposures at 25 µg/L

<sup>b</sup> exposures at 25 µg/mL
